# 1 **Anesthetics uniquely decorrelate hippocampal network activity, alter** 2 **spine dynamics and affect memory consolidation**

3 Wei Yang<sup>1,6</sup>, Mattia Chini<sup>2,6</sup>, Jastyn A. Pöppelau<sup>2</sup>, Andrey Formozov<sup>1</sup>, Patrick Piechocinski<sup>1</sup>,  
4 Cynthia Rais<sup>1</sup>, Fabio Morellini<sup>3</sup>, Olaf Sporns<sup>4,5</sup>, Ileana L. Hanganu-Opatz<sup>2</sup> and J. Simon  
5 Wiegert<sup>1\*</sup>

6

7 <sup>1</sup>Research Group Synaptic Wiring and Information Processing, Center for Molecular  
8 Neurobiology Hamburg, University Medical Center Hamburg-Eppendorf, 20251 Hamburg,  
9 Germany

10 <sup>2</sup>Developmental Neurophysiology, Center for Molecular Neurobiology, University Medical  
11 Center Hamburg-Eppendorf, 20251 Hamburg, Germany

12 <sup>3</sup>Research Group Behavioral Biology, Center for Molecular Neurobiology Hamburg, University  
13 Medical Center Hamburg-Eppendorf, 20251 Hamburg, Germany

14 <sup>4</sup>Department of Psychological and Brain Sciences, Indiana University, Bloomington, Indiana,  
15 USA

16 <sup>5</sup>Indiana University Network Science Institute, Indiana University, Bloomington, Indiana, USA

17 <sup>6</sup>These authors contributed equally

18 \*Correspondence: [simon.wiegert@zmnh.uni-hamburg.de](mailto:simon.wiegert@zmnh.uni-hamburg.de), @SimWieg

19

## 20 **SUMMARY**

21 General anesthesia is characterized by reversible loss of consciousness accompanied by  
22 transient amnesia. Yet, long-term memory impairment is an undesirable side-effect. How  
23 different types of general anesthetics (GAs) affect the hippocampus, a brain region central to  
24 memory formation and consolidation, is poorly understood. Using extracellular recordings,  
25 chronic 2-photon imaging and behavioral analysis, we monitor the effects of isoflurane (Iso),  
26 medetomidine/midazolam/fentanyl (MMF), and ketamine/xylazine (Keta/Xyl) on network  
27 activity and structural spine dynamics in the hippocampal CA1 area of adult mice. GAs robustly  
28 reduced spiking activity, decorrelated cellular ensembles, albeit with distinct activity signatures,  
29 and altered spine dynamics. Iso anesthesia most closely resembled wakefulness, and network  
30 alterations recovered more readily than with Keta/Xyl and MMF. Correspondingly, memory  
31 consolidation was impaired after exposure to Keta/Xyl and MMF, but not Iso. Thus, different  
32 anesthetics distinctly alter hippocampal network dynamics, synaptic connectivity, and memory  
33 consolidation, with implications for GA strategy appraisal in animal research and clinical  
34 settings.

35

## 36 **KEYWORDS**

37 General anesthesia, isoflurane, ketamine, fentanyl, hippocampus, population dynamics,  
38 network activity, spine turnover, episodic memory

39

## 40 INTRODUCTION

41 General anesthesia is a drug-induced, reversible behavioral condition encompassing  
42 unconsciousness, amnesia, sedation, immobility, and analgesia (Rudolph and Antkowiak,  
43 2004; Urban and Bleckwenn, 2002). Together, these aspects represent a state where surgery  
44 can be tolerated without the requirement for further drugs (Urban and Bleckwenn, 2002). The  
45 behavioral effects of GAs are dose-dependent. At clinical (i.e. highest) dosage, they should  
46 induce unconsciousness, even though experimental evidence of this phenomenon is  
47 challenging to collect (in absence of a verifiable consciousness theory). At lower doses, some  
48 GAs cause unresponsiveness and loss of working memory, phenomena that have been both  
49 hypothesized to potentially confound the apparent loss of consciousness (Alkire et al., 2008;  
50 Sanders et al., 2012). At much lower doses still, GAs cause profound retrograde amnesia.  
51 When general anesthesia fails to induce such behavioral effects, intraoperative awareness  
52 ensues, a condition that is associated with long-term negative health consequences (Mashour  
53 et al., 2011). While loss of memory is required for the time period of anesthesia, so that no  
54 memories of the surgical procedure are formed (Antognini and Carstens, 2002; Rudolph and  
55 Antkowiak, 2004), long-term impairments of retrograde or anterograde memories are not  
56 desired. Although general anesthesia is generally considered a safe procedure, growing  
57 literature points to the possibility of long-term negative effects on the central nervous system  
58 (Vutskits and Xie, 2016). This is particularly true for specific categories of patients, such as the  
59 elderly, infants and children (Vutskits and Xie, 2016). Among the observed side effects, the  
60 most common are post-operative cognitive dysfunction syndromes, including post-operative  
61 delirium (POD) and post-operative cognitive decline (POCD). Post-operative cognitive  
62 disturbances are positively correlated with the duration of anesthesia and a single exposure to  
63 GAs can cause retrograde and anterograde memory deficits that persist for days to weeks in  
64 rodent models (Zurek et al., 2014). These aspects point to a generalized action of GAs on the  
65 memory system.

66 Given that amnesia is a fundamental part of general anesthesia and that the hippocampus  
67 controls memory formation and consolidation, it is important to understand how anesthetics  
68 affect hippocampal function. Together with subiculum, the CA1 area constitutes the main  
69 hippocampal output region. CA1 pyramidal cells receive excitatory input mainly from CA3 (in  
70 strata oriens & radiatum) and layer 3 of entorhinal cortex at spine synapses (Neves et al.,  
71 2008), relaying information about external and internal state, respectively (Larkum, 2012).  
72 Thus, CA1 pyramidal cells have been suggested to integrate information about the  
73 environment and internal representations (Bittner et al., 2015; Larkum, 2012), with synaptic  
74 spines being possible sites of memory storage (Frey and Morris, 1997; Kasai et al., 2010;  
75 Segal, 2005; Yang et al., 2009). Moreover, dynamic modulation of spine stability has been  
76 linked to synaptic plasticity (De Roo et al., 2008; Nagerl et al., 2004; Wiegert and Oertner,  
77 2013; Wiegert et al., 2018). Synaptic plasticity, in turn, underlies learning and memory  
78 formation (Whitlock et al., 2006), suggesting that spine turnover in the hippocampus directly  
79 reflects these processes (Attardo et al., 2015; Schmid et al., 2016). Considering the low  
80 concentrations of anesthetics required to induce amnesia, these compounds are thought of  
81 affecting in particular the hippocampus. One possible explanation of this sensitivity is the fact  
82 that a class of  $\gamma$ -aminobutyric acid receptors (GABARs), which is strongly modulated by some  
83 anesthetics, is predominantly expressed in the hippocampus (Bonin and Orser, 2008; Sur et  
84 al., 1999). However, a systematic, in-depth investigation of the effects of anesthetics on the  
85 hippocampus bridging synaptic, network and behavioral levels, is still lacking.

86 Here, using behavioral analysis, extracellular recordings and chronic 2-photon calcium  
87 imaging, we systematically assessed how memory performance, CA1 network dynamics and  
88 synaptic structure are affected by three commonly used combinations of GAs: isoflurane (Iso),  
89 midazolam/medetomidine/fentanyl (MMF), and ketamine in combination with xylazine  
90 (Keta/Xyl). All three GAs strongly reduced overall neuronal spiking and, opposite to what has  
91 been found in the neocortex (Goltstein et al., 2015; Greenberg et al., 2008; Wenzel et al.,  
92 2019), decorrelated network activity, leading to a fragmented network state. However, the  
93 induced patterns of activity were highly distinct between the three different conditions and  
94 recovered to the pre-anesthetic status with disparate rates. Testing the effect of repeated  
95 anesthesia on spine dynamics revealed that Keta/Xyl, the condition which most strongly  
96 affected calcium activity, significantly reduced spine turnover, leading to an overall  
97 (over)stabilization of hippocampal synapses. In contrast, Iso and MMF mildly increased spine  
98 turnover. Finally, we show that the two anesthetic conditions which induce longer-lasting  
99 network alterations, Keta/Xyl and MMF, negatively influenced hippocampus-dependent  
100 memory consolidation. Thus, different anesthetics, despite reaching a similar physiological  
101 state, strongly differ in their effects on synaptic stability, hippocampal network activity, and  
102 memory consolidation.

103

## 104 RESULTS

### 105 Iso, Keta/Xyl and MMF induce distinct patterns of network activity

106 Iso, Keta/Xyl and MMF have distinct molecular targets and modes of action in the brain. We  
107 therefore hypothesized that electrical activity in the hippocampus is uniquely altered by each  
108 of the three anesthesia strategies. To test this hypothesis, we investigated local field potentials  
109 (LFPs) and firing of individual neurons (single unit activity, SUA) extracellularly recorded in the  
110 CA1 area of dorsal hippocampus (dCA1) during wakefulness followed by 45 min of anesthesia  
111 and 45 min of recovery (Fig. 1A, S1A). We found that the anesthetics differently affected  
112 network activity, inducing characteristic modulation of various frequency bands (Fig. 1B).  
113 During wakefulness, LFP power in CA1 was highest in the theta (4-12 Hz) and low-gamma  
114 (40-60 Hz) bands (Fig. S1B). Exposure to 2-2.5% Iso led to a strong reduction of LFP power  
115 > 4 Hz within the first 2 minutes that was accompanied by complete loss of mobility of the  
116 animal (Fig. 1C, S1B,C). Similarly, MMF injection promptly decreased LFP power in the same  
117 frequency bands. In contrast, Keta/Xyl increased power across all frequencies during the first  
118 10 min after injection, the most prominent effect being observed for activity at 5-30 Hz. This is  
119 consistent with previous reports, finding enhanced theta and low-gamma power in CA1 of rats  
120 under ketamine anesthesia (Soltesz and Deschenes, 1993). The initial LFP power increase  
121 was followed by a gradual, significant decrease of 30-100 Hz activity (Fig. 1C, S1B,C).

122 It is widely accepted that, in the neocortex, GAs favor slow oscillations at the expense of faster  
123 ones (Purdon et al., 2015). To determine whether this is also the case in the hippocampus, we  
124 next asked how the investigated anesthetics affect slow network oscillations. Consistent with  
125 previous reports (Collins et al., 2001; Contreras and Steriade, 1995; Steriade et al., 1993),  
126 Keta/Xyl strongly enhanced LFP power at 0.5-4 Hz throughout the entire recording period (Fig.  
127 1C,D, S1C), but suppressed frequencies lower than 0.5 Hz. In contrast, Iso strongly  
128 augmented LFP power below 0.5 Hz, peaking at 0.1-0.2 Hz (Fig. 1C,D, S1C), whereas MMF  
129 induced no significant increase in the low-frequency regime. However, similar to Keta/Xyl, a  
130 significant reduction was present below 0.5 Hz, which persisted throughout the entire recording  
131 period (Fig. 1C,D). The power-law decay exponent ( $1/f$  slope) of the LFP power spectrum has

132 been hypothesized to track excitation/inhibition (E/I) balance, and is reduced under anesthesia  
133 (Gao et al., 2017), indicating a shift towards inhibition. Considering the robust effects on LFP  
134 power that we reported, we reasoned that a similar phenomenon might also occur in the  
135 hippocampus. Indeed, all anesthetics significantly decreased the power-law decay exponent,  
136 albeit with a different temporal profile. While the effect of Iso occurred within a few minutes,  
137 MMF and Keta/Xyl operated on a longer timescale (Fig. 1E). Moreover, periods of activity were  
138 consistently and strongly reduced immediately under Iso and MMF, but delayed by 30 min  
139 under Keta/Xyl (Fig. 1F). These results indicate that all anesthetics shift the LFP to lower  
140 frequencies and the E/I balance towards inhibition, albeit with different temporal profiles.

141 In contrast to Keta/Xyl-anesthesia, Isoflurane- and MMF-anesthesia can be efficiently  
142 antagonized by removing the face mask or injecting a wake-up cocktail (Flumazenil,  
143 Atipamezol and Buprenorphine, FAB) (Albrecht et al., 2014; Fleischmann et al., 2016),  
144 respectively. 20-30 min after Iso withdrawal, animals regained motility and periods of silence  
145 in the LFP receded (Fig. 1C,F). However, in contrast to post-Iso, LFP power did not fully  
146 recover after FAB, remaining significantly reduced at frequencies below 0.5 and above 30 Hz  
147 for the entire 45 min-post anesthesia recording period (Fig. 1C,D). In contrast, elevated LFP  
148 power in the 0.5-4 Hz band and reduction in active periods remained significant throughout the  
149 entire recording in the presence of Keta/Xyl. In line with these results, the 1/f slope promptly  
150 reverted to values similar to baseline after Iso discontinuation. In contrast, the recovery was  
151 only transitory and partial after MMF antagonization, and virtually absent for Keta/Xyl (Fig. 1E),  
152 indicating that the E/I balance recovered only after Iso within 45 min.

153 Cross-frequency coupling between theta and gamma oscillations has been suggested to  
154 underlie information transfer in the hippocampus (Canolty and Knight, 2010). Given the strong  
155 decrease of theta power in the presence of Iso and MMF, we reasoned the phase modulation  
156 of the gamma rhythm could also be altered. To test this, we used phase-amplitude coupling  
157 (PAC) to measure whether the phase of slow LFP oscillations modulates the amplitude of the  
158 signal at a higher frequency. In line with previous results (Scheffer-Teixeira et al., 2012;  
159 Schomburg et al., 2014) a significant coupling between theta and gamma frequency bands, as  
160 well as between frequencies in the 1-2 Hz range and gamma was present in the awake state  
161 (Fig. 1G). Moreover, anesthesia strongly altered PAC. In accordance with the LFP power  
162 analysis, the coupling reached a maximum strength between the dominant slow-frequency  
163 oscillations induced by the various anesthetics (<0.5 Hz for isoflurane, ~1 Hz for MMF and 0.5-  
164 4 Hz for Keta/Xyl) and gamma (Fig. 1G). For all anesthetics, the range of phase-modulated  
165 amplitudes was wide, suggesting that the modulating phase corresponds to the identified slow-  
166 wave activity.

167 Taken together, these data show that all three GAs differently and persistently modulated the  
168 network oscillations in dCA1, a full recovery of activity being detected within 45 min only for  
169 Iso.

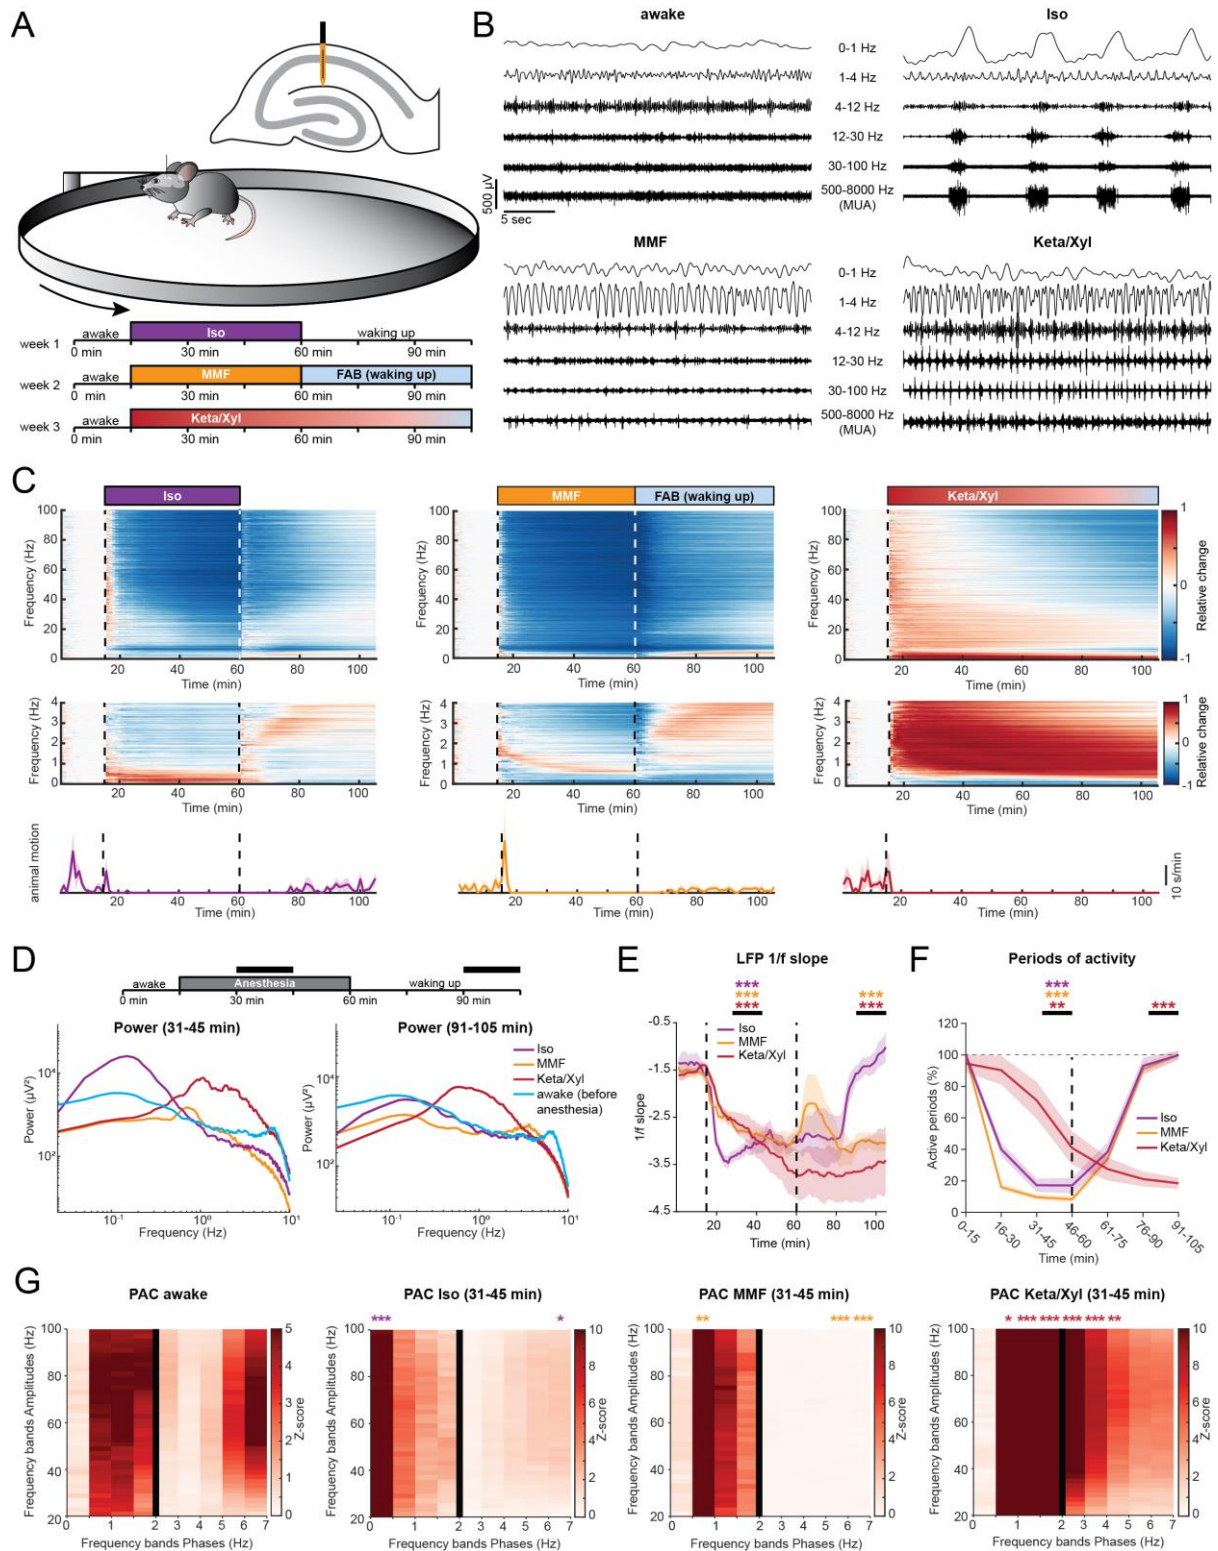

170

171 **Figure 1: LFP recordings in dorsal CA1 during wakefulness and anesthesia reveal distinct and**  
 172 **complex alterations by Iso, Keta/Xyl and MMF. (A) Experimental setup. Extracellular electrical**  
 173 **recordings in dorsal CA1 were performed in four head-fixed mice for 105 min, continuously. Each animal**  
 174 **was recorded under all anesthesia as indicated in the scheme. Order of anesthetics was pseud-**  
 175 **randomized. (B) Characteristic local field potential (LFP) recordings during wakefulness and under three**  
 176 **different anesthetics. (C) Color-coded modulation index (MI) plots (upper and middle panels) for LFP**  
 177 **power and motion profiles (lower panels) for the three different anesthetic conditions. Upper panels**  
 178 **display LFP power for 0-100 Hz frequency range, lower panels for 0-4 Hz. (D) Line plot displaying LFP**  
 179 **power spectra for the two time periods indicated by horizontal black bars. For comparison, the 15-min**

180 spectrum of the awake period before anesthesia induction is plotted in both graphs. Statistical  
181 differences are indicated in Fig. S1C (E) Line plot displaying the power law decay exponent ( $1/f$ ) of the  
182 LFP power spectrum for the 30-50 Hz range. Lines display mean  $\pm$  SEM. (F) Line plot displaying the  
183 fraction of active periods compared to the pre-anesthetic wakeful state, in 15 min bins throughout the  
184 entire recording duration. Lines display mean  $\pm$  SEM. (G) Heat map displaying Phase-amplitude-  
185 coupling (PAC) for pre-anesthetic wakeful state (left) and for the indicated time periods during  
186 anesthesia. Different bin sizes (0.5 Hz and 1 Hz, separated by vertical black line) are used to resolve  
187 low- and high-frequency PAC. Vertical dashed lines in (C) and (E) indicate time points of anesthesia  
188 induction (Iso, MMF, Keta/Xyl) and reversal (Iso & MMF only). Vertical dashed line in (F) indicates time  
189 point of anesthesia reversal (Iso & MMF only). Asterisks in (E) and (F) indicate significance of time  
190 periods indicated by black horizontal line compared to 15-min period before anesthesia. Anesthetic  
191 conditions are color-coded. Asterisks in (G) indicate significant differences compared to the  
192 corresponding frequency band during wakefulness. \*  $p < 0.05$ , \*\*  $p < 0.01$ , \*\*\*  $p < 0.001$ ,  $n = 4$  mice. For  
193 full report of statistics, see statistics table.

194

### 195 **Delayed recovery of neuronal spiking patterns after anesthesia**

196 While the LFP provides information about general network states in the hippocampus, it is  
197 influenced by long-range activity and highly active regions in the vicinity of CA1 (Buzsaki et al.,  
198 2012). To assess the effects of GAs on CA1 neurons, we analyzed the spiking of individual  
199 units (56-72 units per animal,  $n=4$  mice) before, during and after each of the anesthetic  
200 conditions. All anesthetics significantly and rapidly ( $<1$  min) decreased spiking activity in CA1  
201 neurons (Fig. 2A,B, S2), with MMF leading to the most potent suppression, followed by Iso and  
202 Keta/Xyl. Although the bulk spike rate was strongly reduced, the number of active neurons  
203 (see Methods) was only mildly affected (Fig. 2C), reaching a significant reduction only with  
204 MMF. This observation suggests that anesthesia broadly reduces neuronal activity, and does  
205 not modulate only a discrete subpopulation of neurons. Both firing rate and the number of  
206 active neurons recovered within 45 min after reversal for MMF and Iso (Fig. 2A-C, S2).

207 To investigate whether the rhythmicity of single neuron firing was affected similarly to the LFP,  
208 we analyzed the spectral properties of 1 ms-binned SUA firing (i.e. power of SUA spike trains,  
209 for details see Methods). In the presence of Iso, SUA power was consistently increased in the  
210 range between 0 and 0.5 Hz (Fig. 2A,D, S2), in line with the strong modulation of LFP at 0.1-  
211 0.2 Hz. Of note, this effect did not vanish after Iso removal, suggesting that Iso has a long-  
212 lasting impact on firing rhythmicity. In contrast, and in line with its effects on the LFP, MMF  
213 generally reduced, albeit less strongly, SUA power, including the low frequencies. A significant  
214 reduction of SUA power was still present 45 min after antagonization in the 0-0.5 Hz band.  
215 Keta/Xyl, on the other hand, only showed a tendency towards reduced SUA power in the  
216 frequency band below 0.5 Hz, but increased SUA power significantly in the range between 0.5  
217 and 4 Hz, consistent with its effect on the LFP (Fig. 2D). This modulation was present  
218 throughout the entire recording. At higher frequencies, Iso led to a peak in the theta frequency  
219 range, similar to wakefulness (Fig. 2E), yet it reduced the SUA power in the beta/gamma range.  
220 Keta/Xyl and MMF caused an overall reduction in SUA power at frequencies  $>5$  Hz (Fig. 2E).  
221 Thus, GAs differentially impair spiking rhythmicity. These changes appeared to follow similar  
222 dynamics than those in the LFP.

223 To confirm the synchrony between spikes and low-frequency oscillations, we calculated their  
224 pairwise phase consistency (PPC) (Vinck et al., 2012). When compared to pre-anesthesia,  
225 PPC values for the 0-0.5 Hz frequency band were augmented by Iso. Keta/Xyl increased

226 coupling of spikes to the LFP between 0.5 and 1 Hz, whereas MMF showed a weak, but  
 227 significant increase of coupling at frequencies below 1 Hz (Fig. 2F).

228 Similar to the LFP, the SUA firing rate nearly fully recovered during the 45 min post-Iso (Fig.  
 229 2A,B, S2), with even a slight, but significant increase at the end of the recording period. In  
 230 contrast, after FAB-induced MMF reversal, CA1 spiking activity remained slightly reduced,  
 231 reflecting the lack of LFP recovery. For Keta/Xyl, SUA remained suppressed during the entire  
 232 recording period (Fig. 2B). Strikingly, SUA power did not fully recover for any of the tested  
 233 anesthetics (Fig. 2E).

234 Taken together, we show that all investigated GAs caused a persistent and robust reduction  
 235 of CA1 firing. Moreover, spiking during anesthesia was phase-locked to the GA-induced slow  
 236 network oscillations.

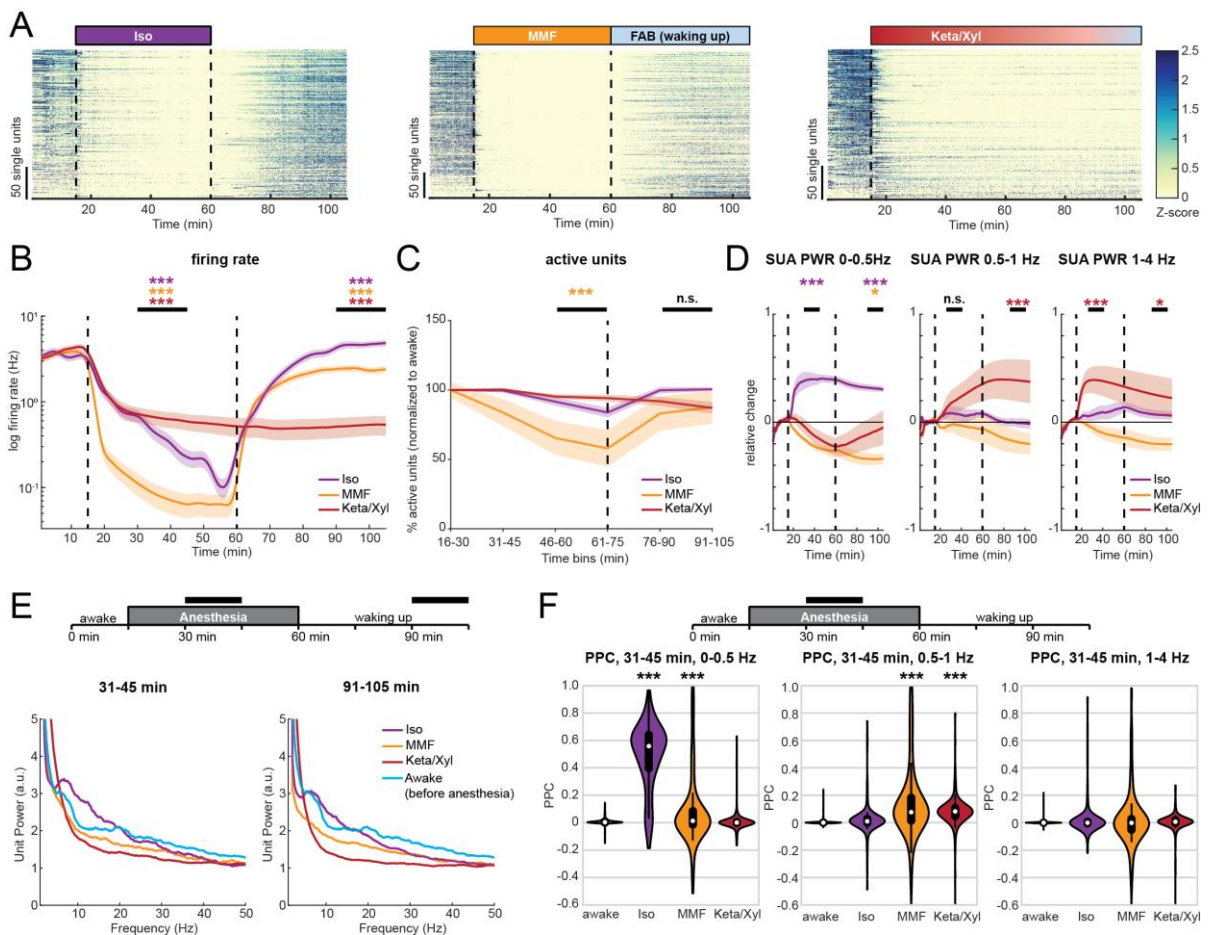

237

238 **Figure 2: Single unit activity in dorsal CA1 is strongly reduced during anesthesia, and remains**  
 239 **significantly altered long after its termination.** (A) Raster plots of z-scored single-unit activity (SUA)  
 240 for the three different anesthetic strategies in four mice. Units are sorted according to initial activity  
 241 during wakefulness. (B) Line plot of SUA firing rate before, during and after anesthesia induction. (C)  
 242 Line plot displaying the fraction of active units compared to the pre-anesthetic wakeful state, for all three  
 243 anesthetics in 15 min bins throughout the entire recording duration. (D) Relative change of population  
 244 firing rate power in the 0-0.5, 0.5-1 and 1-4 Hz frequency band. SUA PWR = power of SUA spike trains.  
 245 (E) Line plot displaying the normalized power spectra of population firing rate for the two time periods  
 246 indicated by horizontal black bars. For comparison, the 15-min spectrum for pre-anesthetic wakeful state  
 247 is plotted in both graphs. (F) Pairwise phase consistency (PPC) at low frequencies in the same frequency  
 248 bands as (D), for the indicated time points during anesthesia. White dots indicate median, vertical thick  
 249 and thin lines indicate 1<sup>st</sup>-3<sup>rd</sup> quartile and interquartile range, respectively. Colored lines in (B) - (D)

250 *display mean  $\pm$  SEM. Vertical dashed lines in panels (A), (B) and (D) indicate time points of anesthesia*  
251 *induction (Iso, MMF, Keta/Xyl) and reversal (Iso & MMF only). Vertical dashed line in (C) indicates time*  
252 *point of anesthesia reversal (Iso & MMF only). Asterisks in (B) - (D) indicate significance of time periods*  
253 *indicated by black horizontal line compared to period before anesthesia. Anesthetic conditions are color-*  
254 *coded. Asterisks in (F) indicate significant differences to wakefulness. \*  $p < 0.05$ , \*\*  $p < 0.01$ , \*\*\*  $p <$*   
255 *0.001,  $n = 4$  mice. For full report of statistics, see statistics table.*

256

## 257 **Iso, Keta/Xyl and MMF reduce number, amplitude, and duration of calcium transients**

258 To monitor the population dynamics of CA1 neurons in the presence of different anesthetics,  
259 we imaged the same field of view (FOV) using the genetically encoded indicator GCaMP6f  
260 (Chen et al., 2013) and systematically compared the activity of identified neurons during quiet  
261 wakefulness and in the presence of different anesthetics (Fig. 3A).

262 First, we considered all active neurons in each condition and analyzed the average rate (i.e.,  
263 the number of transients), amplitude, and duration (i.e., the decay constant) of calcium  
264 transients across all imaging sessions in 7 mice. In line with the results of SUA analysis (see  
265 Fig. 2C), a large number of CA1 pyramidal neurons were active in the presence of all three  
266 GAs. Using extraction parameters that restricted the number of ROIs but maximized signal  
267 quality (see Methods), we obtained a median of 311 (min-max of 16-817) active neurons per  
268 FOV, for a total of 189 five-minutes recordings. All GAs significantly altered calcium dynamics  
269 in CA1 neurons, reducing the activity (Fig. 3C,D), as previously shown for neuronal spiking  
270 (Fig. 2B). However, each condition could be characterized by a specific signature in their  
271 calcium dynamics. Iso yielded only a mild decrease of rate and amplitude, but a strong  
272 reduction of duration of calcium transients (Fig. 3D). Consistent with effects on LFP and SUA,  
273 calcium transients showed a spectral peak between 0.1 and 0.2 Hz (Fig. S4). In contrast to  
274 Iso, MMF did not significantly affect the duration of transients but reduced their rate and  
275 amplitude when compared to wakefulness. Keta/Xyl-anesthesia had the strongest effect on  
276 calcium transients, leading to a reduction of all three parameters compared to wakefulness  
277 (Fig. 3D). Unlike for electrophysiological recordings, no spectral peak was present in calcium  
278 transients, most likely due to the strong suppression of calcium activity by Keta/Xyl.  
279 Considering all parameters, the four groups tended to segregate into clusters, one consisting  
280 mostly of recordings under Keta/Xyl, and another one consisting of awake and Iso recordings.  
281 Most recordings under MMF clustered between these two groups (Fig. 3E). Importantly, these  
282 findings were robust to changes in the signal extraction pipeline. Varying the threshold for  
283 calcium transient detection across a wide range of values did not affect the reported effects on  
284 rate and height of transients (Fig. S3B). Further, conducting the same analysis on neuronal  
285 activity metrics that are independent of calcium transients detection (integral and standard  
286 deviation) or on dF/F calcium signals also yielded analogous results (Fig. S3C-E).

287



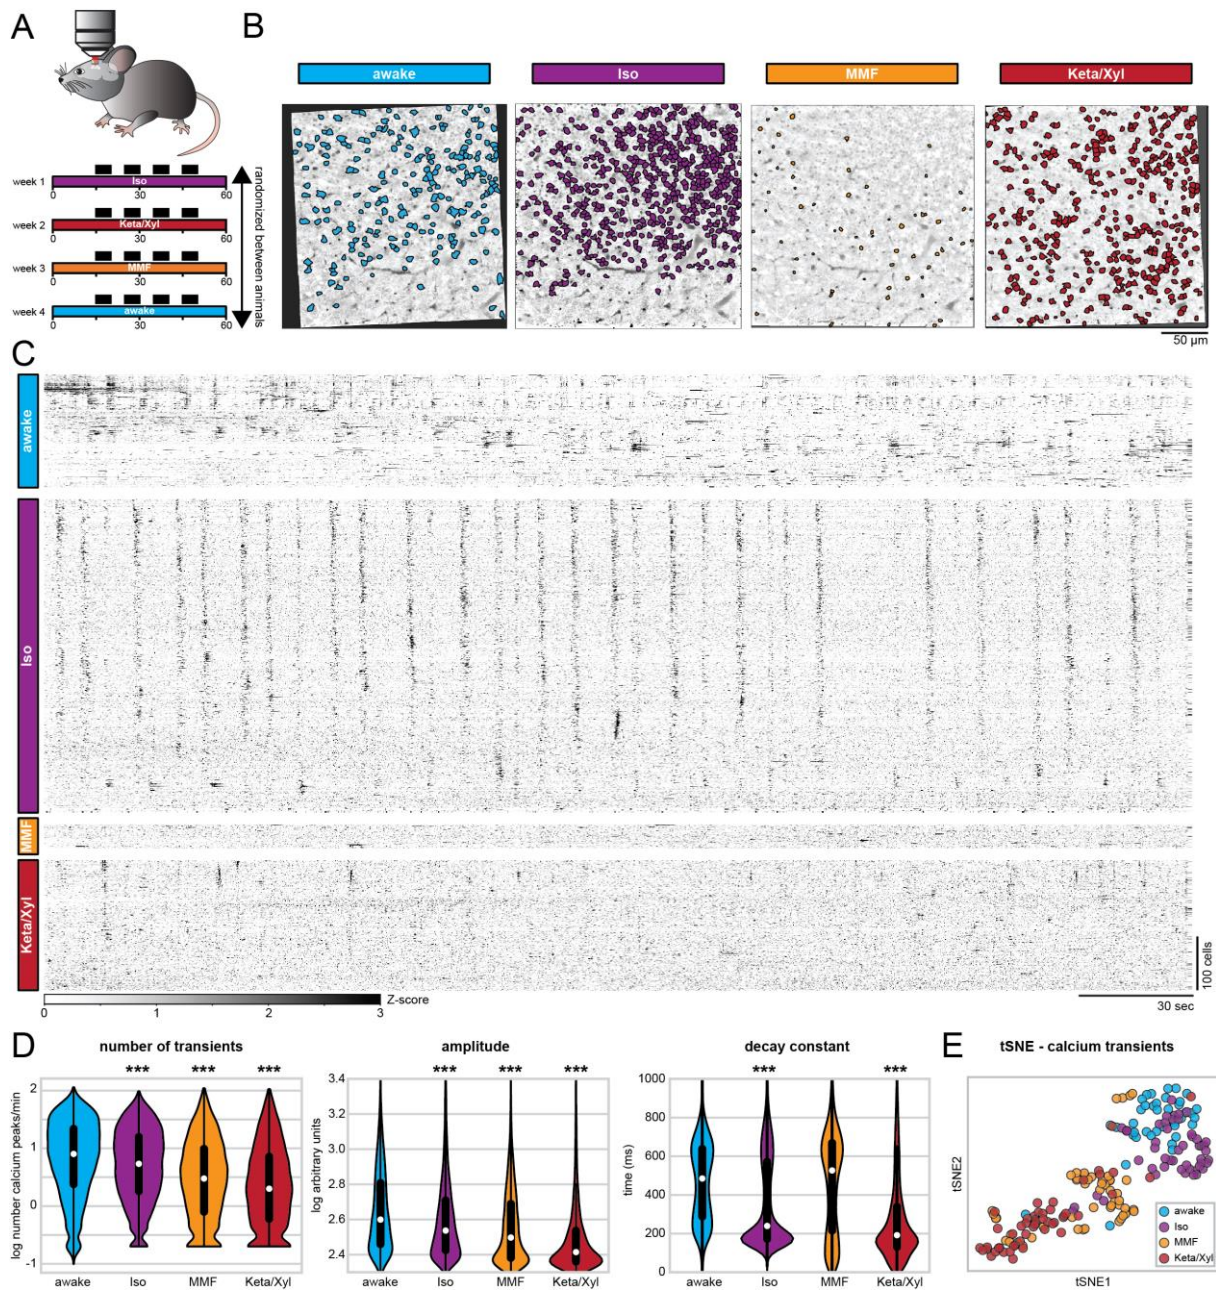

288

289 **Figure 3: Repeated calcium imaging in dorsal CA1 reveals distinct activity profiles for Iso, MMF**  
 290 **and Keta/Xyl. (A)** Experimental strategy for chronic calcium imaging of cellular activity in dorsal CA1.  
 291 For each condition, mice were imaged four times for five minutes in seven mice, as indicated by black  
 292 fields in the scheme. The order of imaging conditions was pseudo-randomized. **(B)** Time-averaged, two-  
 293 photon images of the same FOV in CA1 aligned to the Iso condition. ROIs of automatically extracted,  
 294 active neurons are overlaid for each condition. **(C)** Raster plots of z-scored calcium transients in the  
 295 same animal under different conditions. Traces are sorted by similarity. **(D)** Violin plots quantifying the  
 296 number (left), amplitude (middle), and decay (right) of detected calcium transients. White dots indicate  
 297 median, vertical thick and thin lines indicate 1<sup>st</sup>-3<sup>rd</sup> quartile and interquartile range, respectively. **(E)** tSNE  
 298 plot summarizing the average calcium transients properties. Each data point represents one recording  
 299 session. Asterisks in (D) indicate significant differences to wakefulness. \*\*\*  $p < 0.001$ . Note, to facilitate  
 300 readability, only differences to wakefulness are indicated. For full report of statistics, see statistics table.

301

302

303

304 **Iso, Keta/Xyl and MMF distinctly modulate cellular calcium dynamics in a given neuron**

305 One possible explanation for these distinct modes of calcium activity could be that each  
306 anesthetic condition recruits a unique set of neurons characterized by particular spiking  
307 properties. We tested this possibility by analyzing calcium transients in neurons that were  
308 active during all conditions (Fig. 4A, S5, S6). To obtain a sufficient number of active neurons,  
309 we extracted calcium transients using a lower quality threshold, accepting more neurons per  
310 recording (see Methods). In this manner, we obtained a median of 783 neurons per recording  
311 (min-max of 156-1641). While this shifted the overall distribution of calcium parameters to lower  
312 values, the relative ratios between the four conditions remained the same and the differences  
313 between anesthesia groups were preserved (Fig. S3F-G). Also, when considering only  
314 neurons that were active in all four conditions, rate as well as amplitude of calcium peaks were  
315 generally reduced under anesthesia being lowest in the Keta/Xyl condition (Fig. 4B,C).  
316 Compared to the whole dataset, differences in decay constant were less pronounced. The  
317 median decay constant strongly decreased for awake and MMF conditions, while it increased  
318 for Iso and Keta/Xyl. These results indicate that both the between- as well as the within-  
319 condition variance strongly decreased when considering only neurons active under all  
320 conditions.

321 The relatively low number of neurons active in all four conditions (335 neurons) limited the  
322 statistical analysis. Therefore, we additionally compared neurons that were active in any two  
323 combinations of conditions (Fig. S7). This analysis further corroborated the similarity of  
324 neurons active during wakefulness and Iso anesthesia (Fig. 4C, S7). Rate, amplitude, and  
325 duration of calcium transients were most similar between wakefulness and Iso compared to  
326 the other GAs. In contrast, neurons active during wakefulness and either Keta/Xyl or MMF  
327 showed decreased rate, amplitude and duration under anesthesia, with Keta/Xyl causing the  
328 strongest phenotype (Fig S7). Overall, this indicates that anesthetics influence the firing  
329 properties of hippocampal neurons. However, the magnitude and the direction of these effects  
330 vary considerably. Iso anesthesia has the mildest effect, and it most likely arises from distinct  
331 neuronal populations being active in the two conditions (wakefulness vs. Iso anesthesia), as  
332 the firing properties of cells that are active in both are barely affected (Fig. 4B,C). On the other  
333 hand, the strong effects of MMF and Keta/Xyl on all calcium parameters in the same cells  
334 indicate that different anesthetics directly alter the firing properties of individual neurons. Thus,  
335 alterations in firing properties of neuronal populations (e.g. SUA, Fig. 2B-D) are not solely  
336 explainable by different subpopulations of neurons being active between awake and  
337 anesthesia.

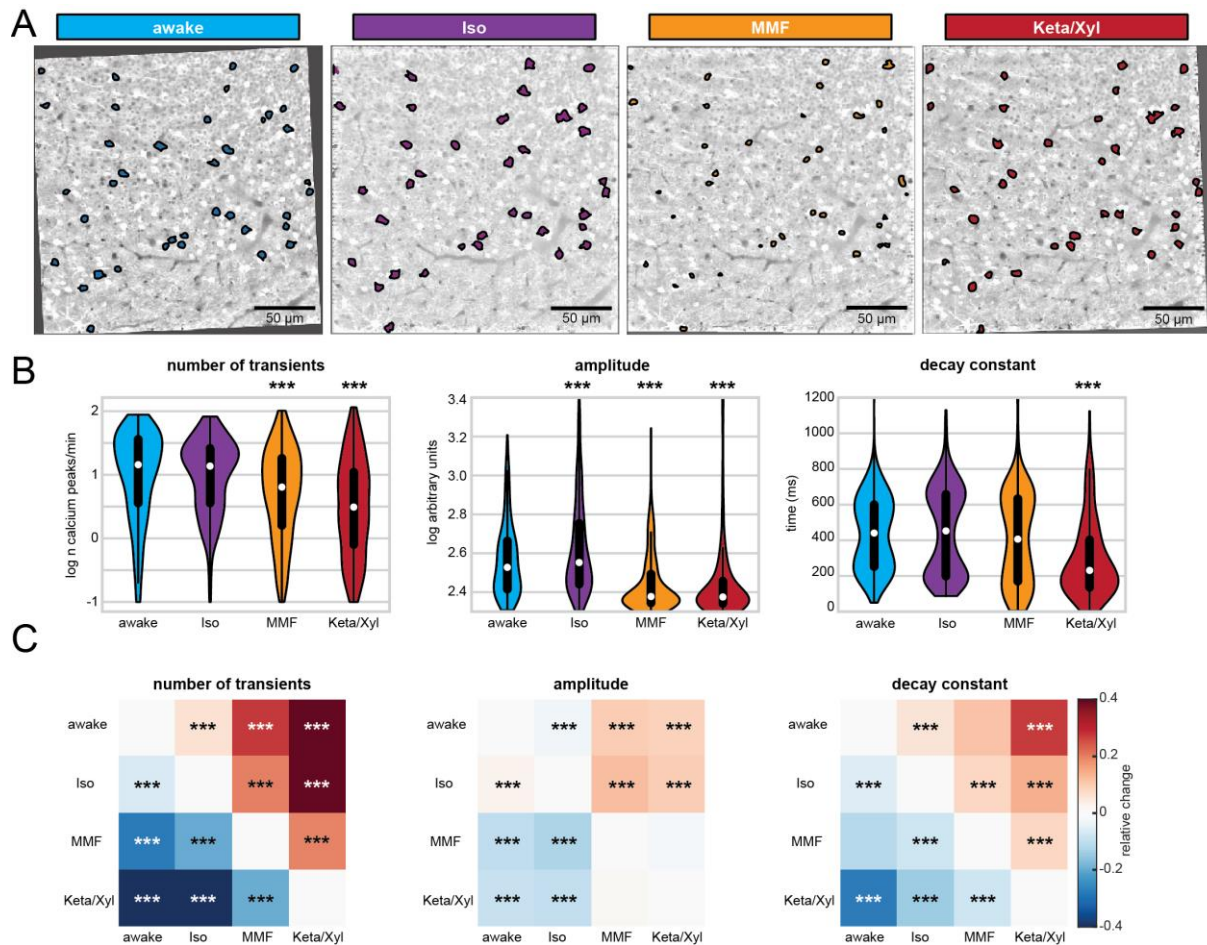

338

339 **Figure 4: Calcium activity profiles in neurons active during all conditions are similar between**  
 340 **wakefulness and Iso. (A)** Two-photon time-averaged images of the same FOV in CA1, aligned to the  
 341 Iso condition (same images as in figs. 3). ROIs show neurons that were active in each condition, allowing  
 342 direct comparison of calcium transients in the same cells under different conditions. **(B)** Violin plots  
 343 quantifying the number (left), amplitude (middle), and decay (right) of detected calcium transients. White  
 344 dots indicate median, vertical thick and thin lines indicate 1<sup>st</sup>-3<sup>rd</sup> quartile and interquartile range,  
 345 respectively. **(C)** Heat maps displaying the relative change in the number (left), amplitude (middle), and  
 346 decay (right) of calcium transients between neurons active in pairs of conditions (see also Fig. S7).  
 347 Asterisks in (B) and (C) indicate significant differences to wakefulness. \*\*\*  $p < 0.001$ . Note, to facilitate  
 348 readability, only differences to wakefulness are indicated. For full report of statistics, see statistics table.

349

### 350 Anesthesia decorrelates hippocampal activity

351 Calcium imaging studies in the visual cortex of ketamine anesthetized rats (Greenberg et al.,  
 352 2008) and isoflurane anesthetized mice (Goltstein et al., 2015) showed that anesthesia  
 353 increases the overall pairwise correlations between firing neurons, and consequently, induces  
 354 more structured patterns of activity in the neocortex. While neocortical L2/3 cells typically show  
 355 a high degree of local interconnectivity (Harris and Mrsic-Flogel, 2013), this is not the case for  
 356 CA1, where pyramidal cells receive their main excitatory input from CA3 and entorhinal cortex  
 357 and send their efferents to subiculum and extrahippocampal areas (Neves et al., 2008).  
 358 Another difference between neocortex and hippocampal CA1 area is that the neocortex  
 359 receives strong direct input from primary thalamus, which is a major source for slow oscillations  
 360 during anesthesia-induced unconsciousness and sleep (Franks, 2008; Klinzing et al., 2019;  
 361 Rudolph and Antkowiak, 2004). In comparison to neocortex, hippocampus shows different

362 patterns of activity, including sharp waves, which are generated intrinsically in the  
363 hippocampus, likely originating in CA3 (Buzsaki, 1986). To investigate whether these  
364 differences cause a different impact of anesthesia on the population activity in CA1 when  
365 compared to the neocortex, we analyzed the dynamical structure of population activity using  
366 both calcium imaging and SUA of extracellular recordings in vivo. First, we analyzed Fisher-  
367 corrected Pearson pairwise correlation between neuropil-corrected, raw fluorescence traces.  
368 We found that both correlation and anticorrelation were highest in animals during quiet  
369 wakefulness (Fig 5A-B). In particular, the awake condition had a higher proportion of  
370 correlation coefficients both in the 1<sup>st</sup> as well as in the 4<sup>th</sup> quartile of the entire distribution and,  
371 accordingly, higher absolute correlation values (Fig. 5B, S8A). Similar to the firing properties,  
372 Iso induced the milder changes, whereas Keta/Xyl caused the strongest phenotype. This  
373 relationship was preserved in neurons active during all conditions (Fig. S8B), indicating that  
374 anesthesia generally reduces correlated activity between neurons and that this effect is not  
375 attributable to the activity of particular neuronal subpopulations. Moreover, these effects were  
376 not influenced by the distance between the pair of neurons whose correlation was quantified  
377 (Fig. 5C). These findings highlight the major differences between the anesthesia-induced  
378 effects on neuronal coupling in hippocampal CA1 and neocortex. In accordance with the  
379 anatomy of CA1, the correlation between pairs of neurons was only mildly affected by the  
380 distance between them, with or without anesthesia. Not only were neurons less highly  
381 correlated to each other under anesthesia, but their coupling to the whole population activity  
382 (Okun et al., 2015) was reduced as well. The proportion of neurons with population coupling  
383 in the 4<sup>th</sup> quartile of the entire distribution was highest for awake, and most strongly reduced  
384 under Keta/Xyl and MMF, while Iso showed only mild effects (Fig. 5D).

385 To further relate the calcium imaging data to extracellular recordings of neuronal firing, we  
386 carried out an analogous analysis on SUA. To avoid the confounding effect of firing rate, we  
387 quantified the correlation between pairs of neurons using the Spike-Time Tiling Coefficient  
388 (Cutts and Eglén, 2014), a measure that is largely insensitive to variations of the firing rate  
389 (see Methods). To be consistent with the calcium data, we quantified correlations within 1  
390 second, a timescale of the same magnitude as the decay constant used to extract calcium  
391 signals (700 ms). This analysis confirmed that all anesthetics decorrelated neuronal activity  
392 (Fig. 5E). This effect was still present, albeit less strongly pronounced, using an integration  
393 window of 10 ms, which is closer to the duration of electrically measured spikes (Fig. S9).  
394 Overall, the decorrelation was milder under Iso anesthesia and stronger under Keta/Xyl and  
395 MMF. Thus, all three GAs decorrelated calcium transients and spiking activity in the CA1 area,  
396 with MMF and Keta/Xyl inducing the most prominent effects.

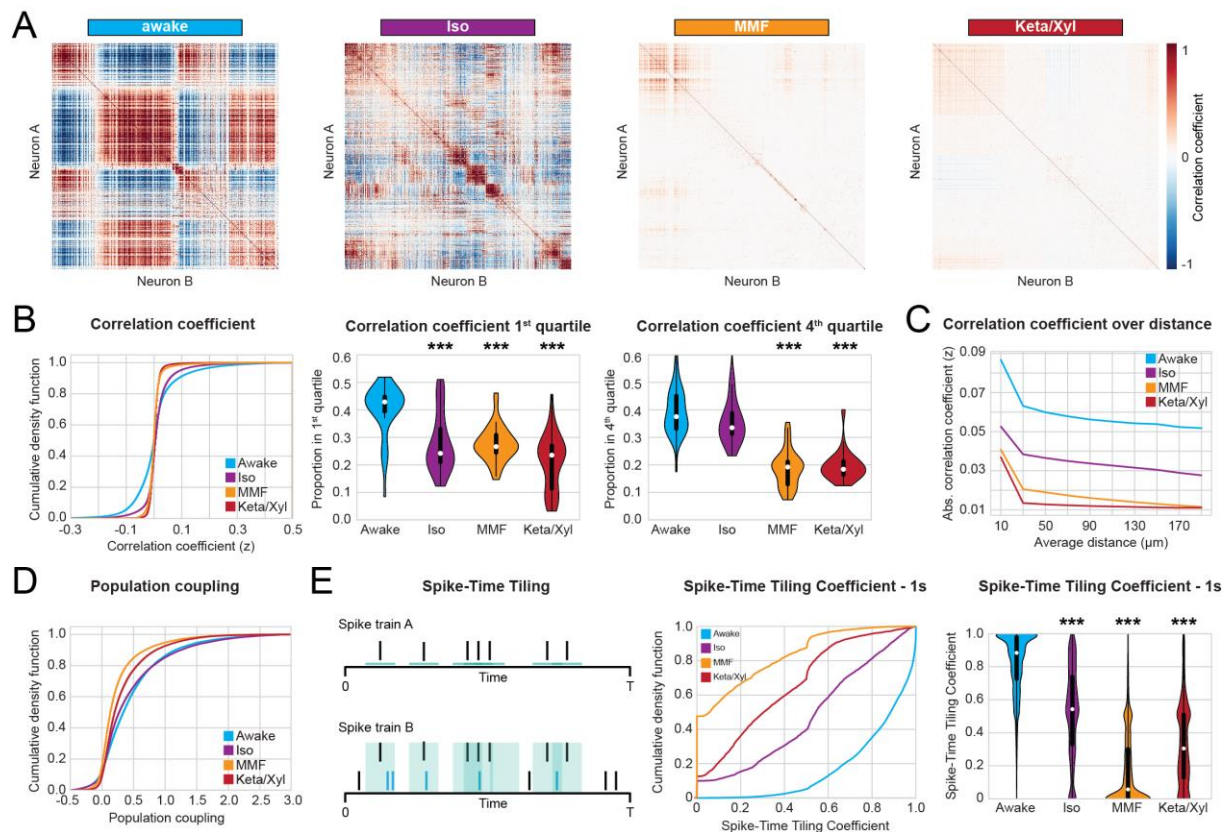

397

398 **Fig. 5. Correlation analysis of CA1 calcium and spiking shows decorrelation under anesthesia.**  
 399 **(A)** Heat maps displaying representative correlation matrices between pairs of neurons during  
 400 wakefulness and the three different anesthetic conditions, in the same animal. Matrices are sorted by  
 401 similarity. **(B)** Left: Line plot displaying cumulative distribution of Fisher-corrected Pearson correlation  
 402 coefficients between pairs of neurons. Center: violin plot displaying the proportion of pairs found in the  
 403 1<sup>st</sup> (most negative) and 4<sup>th</sup> (most positive) quartile of the distribution. **(C)** Line plot displaying the absolute  
 404 pairwise correlation coefficients over distance (25 micrometer bins). **(D)** Line plot displaying cumulative  
 405 distribution of population coupling. **(E)** Quantification of correlation between pairs of extracellularly  
 406 recorded single units using the Spike-Time Tiling Coefficient (STTC). Left: Schematic illustration of the  
 407 STTC quantification. Center: cumulative distribution of the STTC with a 1000 ms integration window.  
 408 Right: violin plot quantifying the STTC. In violin plots, white dots indicate median, vertical thick and thin  
 409 lines indicate 1<sup>st</sup>-3<sup>rd</sup> quartile and interquartile range, respectively. Asterisks in **(B)** and **(E)** indicate  
 410 significant differences to wakefulness. \*\*\*  $p < 0.001$ . Note, only differences to wakefulness are indicated.  
 411 For comparison between conditions, see statistics table.

412

### 413 Anesthesia fragments temporal and spatial structure of hippocampal activity

414 The decorrelation of neuronal activity during anesthesia suggests that GAs might impact the  
 415 spatial and temporal organization of CA1 neuronal ensembles (see Fig. 5A). To test this  
 416 hypothesis, we analyzed the same number of active neurons for each condition, since a  
 417 different number of neurons in each condition potentially influences the number and size of  
 418 detected clusters (Wenzel et al., 2019). First, we monitored the impact of GAs on the temporal  
 419 structure of CA1 activity. We defined the number of clusters identified by principal component  
 420 analysis (PCA) as the number of components that were needed to explain 90% of the variance.  
 421 Moreover, we assessed the power-law slope of variance explained over the first 150  
 422 components (Fig. 6A). Both methods led to a larger number of clusters and a flatter power-law  
 423 slope for anesthesia when compared to wakefulness (Fig. 6A). Further corroborating these

424 findings, both tSNE dimensionality reduction and affinity propagation (AP) clustering (see  
 425 Methods) also revealed a larger number of clusters for anesthesia compared to wakefulness  
 426 (Fig. 6B,C). These observations indicate that activity is less structured under anesthesia. In  
 427 line with previous results, Iso had the weakest effect, whereas Keta/Xyl consistently induced  
 428 the most pronounced phenotype. Analysis on the deconvolved calcium traces led to  
 429 comparable results (Fig S10A,B). These findings support the idea that GAs cause a  
 430 fragmentation of the network consisting of a more diverse repertoire of microstates.

431 Second, we tested whether anesthesia disrupted the spatial structure of hippocampal activity,  
 432 employing a modularity maximization approach (Newman and Girvan, 2004; Sporns and  
 433 Betzel, 2016) designed to detect internally densely connected communities (modules). To  
 434 allow detection of modules at varying sizes, we carried out our analysis while varying a  
 435 resolution parameter (gamma) and thus focusing on different spatial scales. Using this  
 436 approach, we showed that GAs increase the number of detected communities over a wide  
 437 range of resolution parameter values (Fig 6D). Moreover, the modularity of these communities  
 438 was lower than in wakefulness (Fig 6E). These results indicate that anesthesia results in a  
 439 more fractured network with, on average, smaller and less coherent communities. A multi-  
 440 resolution approach (Jeub et al., 2018) followed by the selection of partitions based on  
 441 hierarchical consensus clustering yielded similar results (Fig. S10C). Among GAs, Iso induced  
 442 the mildest phenotype, whereas Keta/Xyl had the most prominent effects. Thus, GAs not only  
 443 decorrelate hippocampal activity, but also consistently fragment both its temporal and spatial  
 444 structure.

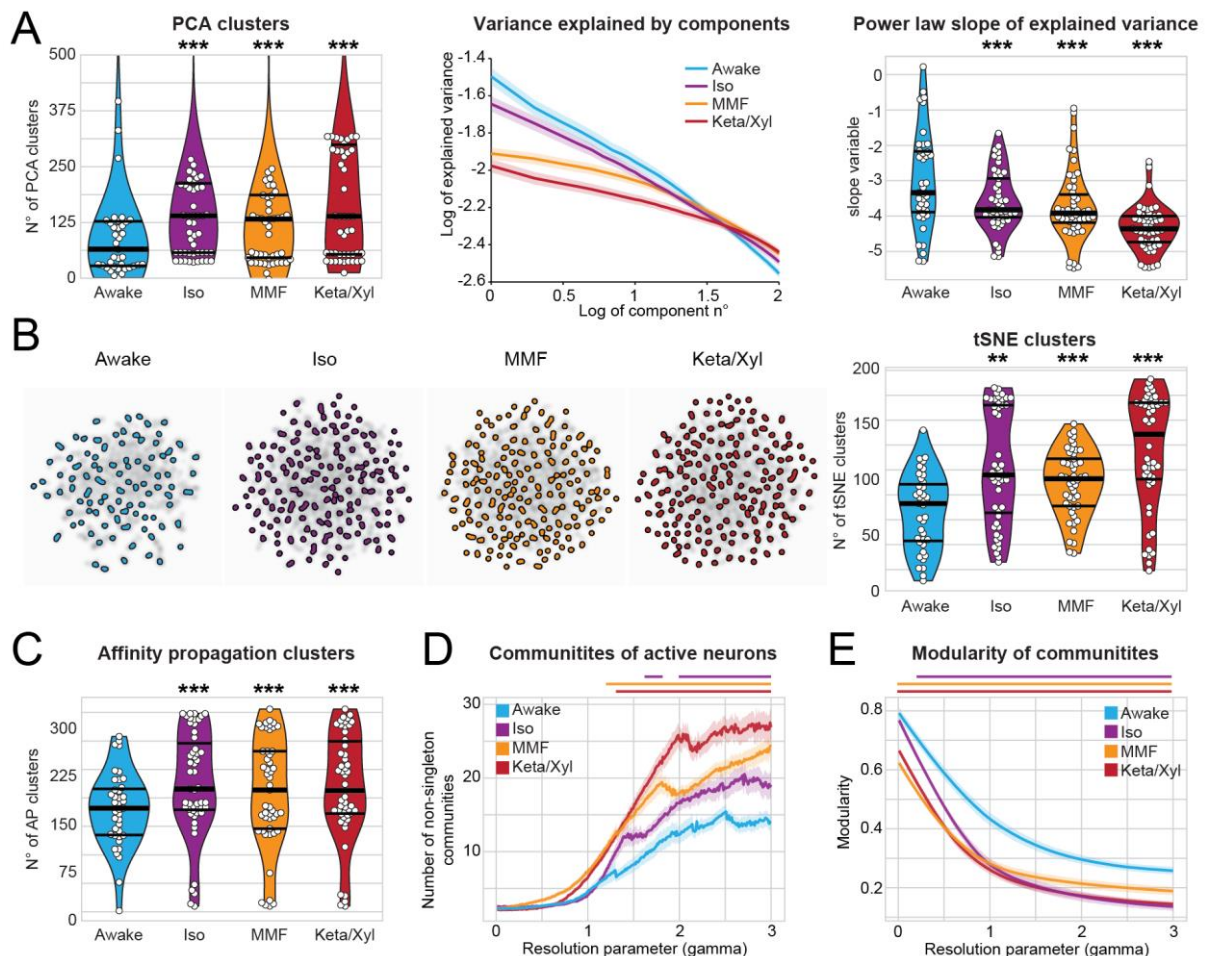

445

446 **Fig. 6. Calcium activity in CA1 is temporally and spatially fragmented during anesthesia.** (A) Left:  
447 violin plot quantifying the number of principal component analysis (PCA) clusters during wakefulness or  
448 anesthesia, as indicated. Middle: loglog line plot displaying the variance explained by the first 100  
449 components for each condition. Right: violin plot quantifying the power-law slope of the variance  
450 explained by the first 100 components for each condition. (B) Left: tSNE plots of network events  
451 recorded in the same animal under the four indicated conditions. Right: Violin plot quantifying the  
452 number of tSNE clusters obtained from calcium recordings during the four different treatments. (C) Violin  
453 plot quantifying the number of clusters obtained by affinity propagation from calcium recordings during  
454 the four different treatments. (D) and (E) Line plots quantifying the number of detected communities and  
455 the modularity of the detected communities with the resolution parameter  $\gamma$  ranging from 0 to 3.  
456 Horizontal lines in violin plots indicate median and 1<sup>st</sup>-3<sup>rd</sup> quartile. Asterisks in (A) - (C) indicate significant  
457 differences to wakefulness. \*\*  $p < 0.01$ , \*\*\*  $p < 0.001$ . Horizontal lines above plots in (D) - (E) indicate  
458 significant difference to wakefulness. Anesthetic conditions are color-coded. Note, only differences to  
459 wakefulness are indicated. For comparison between conditions, see statistics table.

460

### 461 Repeated anesthesia alters spine dynamics in CA1

462 The impact of Iso, MMF, and Keta/Xyl on CA1 activity might alter spine dynamics at CA1  
463 pyramidal neurons. This issue is of critical relevance, since GAs disrupt activity patterns during  
464 development (Chini et al., 2019) also involving alteration of synaptic connectivity (Briner et al.,  
465 2010; Briner et al., 2011; De Roo et al., 2009), but less is known about the impact of GAs on  
466 hippocampal synaptic structure during adulthood. So far, spine dynamics in hippocampus were  
467 only investigated under anesthesia, lacking comparison to the wake state. Moreover, the  
468 reported turnover rates varied strongly between studies (Attardo et al., 2015; Gu et al., 2014;  
469 Pfeiffer et al., 2018). Thus, it is unknown how repeated anesthesia in itself affects spine  
470 stability.

471 We repeatedly imaged the same basal, oblique, and tuft dendritic segments of CA1 pyramidal  
472 neurons under all four conditions (five times per condition, every four days), interrupted by a  
473 30-day recovery period between conditions (Fig. 7A, S11A). To rule out time-effects, we  
474 pseudo-randomized the order of anesthetics (Fig. S11A). During wakefulness, without any  
475 anesthesia in between, the turnover ratio of spines on all dendrites was on average 18.6 - 20.5  
476 % per four days. This turnover ratio was stable and did not change systematically over  
477 successive imaging sessions (Fig. 7B). Notably, all anesthetics affected spine turnover. Both  
478 MMF and Iso anesthesia mildly increased the turnover ratio compared to wakefulness (21.1 –  
479 23.8 % for MMF, 24.0 – 24.7 % for Iso). Iso did not alter the surviving fraction of spines.  
480 Together with the significant increase in spine density over time (Fig. 7B) these results indicate  
481 that the elevated turnover ratio was due to a rise in the gained fraction of spines (Fig. S11B).  
482 In contrast, MMF led to a slight increase in the fraction of lost spines (Fig. S11B) and  
483 correspondingly, slightly decreased the surviving fraction compared to wakefulness. Spine  
484 density did not change over time. Keta/Xyl anesthesia showed the strongest effect on spine  
485 turnover (13.4 - 15.7 %), which was opposite to MMF and Iso, and therefore significantly lower  
486 rather than higher compared to the awake condition (Fig. 7B). This lower turnover ratio was  
487 accompanied by a higher surviving fraction and an increase in density with time (Fig. 7B).  
488 Consistently, the fraction of lost spines was most strongly reduced (Fig. S11B). Thus, Keta/Xyl  
489 anesthesia resulted in marked stabilization of existing spines and a reduction in the formation  
490 of new spines, indicative of a significant effect on structural plasticity.

491 To rule out that the age of the animal influenced spine dynamics in the awake condition, we  
492 measured spine turnover in a group of age-matched animals to the first anesthesia group (Fig.

493 S11A,C). Moreover, to rule out that the chronic imaging procedure per se and anesthesia in  
 494 general had a long-lasting effect on the awake imaging condition, we added another awake-  
 495 imaging control group with naïve, age-matched animals to the awake imaging time point in the  
 496 experimental group (Fig. S11A,C). In all three groups, spine turnover was indistinguishable,  
 497 indicating that neither age nor previous imaging under anesthesia impacted spine dynamics in  
 498 the awake-imaging group (Fig. S11C).

499 Next, we asked whether the modulation of spine turnover by GAs was due to acute remodeling  
 500 of spines during the time of anesthesia. Alternatively, spine turnover might be driven by long-  
 501 lasting changes in network activity imposed by the slow reversal of all GAs. To capture fast  
 502 events such as filopodia formation, we acquired image stacks every 10 min (Fig. 7C). Spine  
 503 turnover, survival, or density were not significantly altered during the one hour of imaging (Fig.  
 504 7D). Thus, spines were stable during the one hour irrespective of the treatment. While mature  
 505 spines typically show low elimination/formation rates over one hour, filopodia are more  
 506 dynamic (Dailey and Smith, 1996; Lendvai et al., 2000; Portera-Cailliau et al., 2003). Unlike  
 507 other reports, that observed an acute selective formation of filopodia under Keta/Xyl, but not  
 508 Iso (Yang et al., 2011), we did not detect any acute effects of GAs on filopodia turnover of CA1  
 509 pyramidal cell dendrites. Thus, chronic exposure to all GAs consistently impacted spine  
 510 dynamics, whereas acute effects were lacking. Keta/Xyl caused a strong decrease in spine  
 511 turnover, accompanied by a higher surviving fraction and an increased density over time.

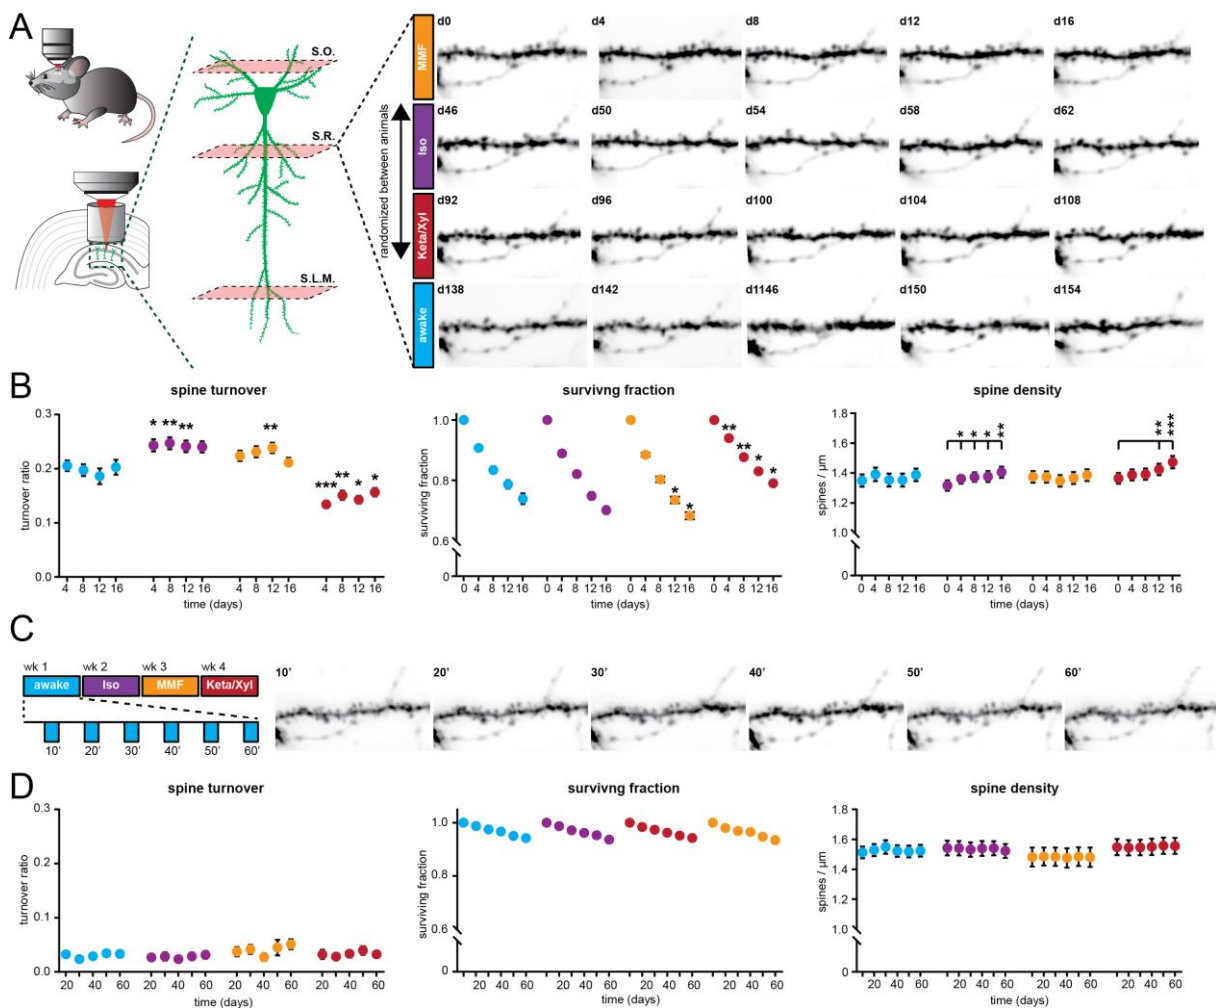

512

513 **Fig. 7. Spine turnover at CA1 pyramidal neurons is distinctly altered by repeated application of**  
 514 **Iso, MMF and Keta/Xyl. (A) Left: Schematic illustration of in vivo spine imaging strategy. In each animal,**



515 spines were imaged on basal dendrites located in stratum oriens (S.O.), oblique dendrites in stratum  
516 radiatum (S.R.) and tuft dendrites in stratum lacunosum moleculare (S.L.M.). Right: Example showing  
517 an oblique dendrite in S.R. imaged chronically during all conditions. The order of anesthetic treatments  
518 was pseudo-randomized between mice (see Fig. S11). **(B)** Dot plots showing quantification of spine  
519 turnover (left), spine survival (middle) and spine density (right) under the four indicated treatments. Note  
520 that spines were imaged on the same dendrites across all conditions. Dots indicate mean  $\pm$  SEM.  
521 Asterisks indicate significant differences to wakefulness in the left and middle panel. In the right panel,  
522 asterisks denote significant changes within each treatment compared to day 0. \*  $p < 0.05$ , \*\*  $p < 0.01$ ,  
523 \*\*\*  $p < 0.001$ . **(C)** Imaging of acute spine dynamics during four different conditions. Left: schematic of  
524 the experimental timeline. Right: example of dendrite imaged during wakefulness in 10 min intervals  
525 (same dendrite as in A). **(D)** Dot plots showing quantification of acute spine turnover (left), spine survival  
526 (center) and spine density (right) under the four indicated treatments. Dots indicate mean  $\pm$  SEM.

527

## 528 **Episodic memory consolidation is impaired by MMF and Keta/Xyl, but not by Iso**

529 Episodic memory formation and consolidation require hippocampal activity. Newly learned  
530 experiences are thought of being consolidated via replay events that co-occur with low-  
531 frequency oscillations (Klitzing et al., 2019; Moscovitch et al., 2016; Nadel and Moscovitch,  
532 1997; O'Neill et al., 2010). In the hippocampus, these low-frequency events typically occur as  
533 sharp waves (Buzsáki, 1986) during sleep, but also during awake resting behavior (O'Neill et  
534 al., 2010). The above results from electrophysiological recordings and imaging showed that  
535 GAs strongly altered network oscillations in the CA1 area, in the case of MMF and Keta/Xyl,  
536 also long after anesthesia discontinuation. Spine turnover of CA1 pyramidal neurons was also  
537 affected, especially after Keta/Xyl administration. Therefore, we tested whether inducing  
538 anesthesia for 1 hour shortly after the acquisition of a new episodic memory affected its  
539 consolidation (Fig. 8A). In line with previous experiments, we restricted Iso and MMF  
540 anesthesia to one hour, while Keta/Xyl anesthesia was left to recede spontaneously. We  
541 assessed episodic-like memory with a water maze protocol for reversal learning, when the  
542 hidden platform was moved to the quadrant opposite the initial target location (Fig. 8A).  
543 Specifically, we tested the effects of the different anesthetics on the consolidation of the  
544 memory of the new platform location. We compared the performance of the mice during the  
545 probe trial done on day 3 immediately after the reversal learning protocol (and 30 min before  
546 anesthesia), with the performance during the probe trial on day 4, twenty-four-hours after  
547 anesthesia. During the probe trial on day 3, animals of all four groups spent significantly more  
548 time in the new target quadrant compared to chance (25 %), indicating that they learned the  
549 new platform position successfully (Fig. 8B,C).

550 On day 4, control animals that did not undergo anesthesia showed the same performance as  
551 on day 3, suggesting that they had retained the memory of the new platform location (Fig.  
552 8B,C). However, animals that were anesthetized with Keta/Xyl or MMF spent significantly less  
553 time in the new target quadrant and showed a significantly larger mean distance to the target  
554 platform position compared to the probe trial on day 3. In the Iso group, no significant difference  
555 compared to day 3 was detectable (Fig. 8B,C, S12). Notably, the effects were relatively mild,  
556 and the decrease in performance on day 4 was not significantly different between treatment  
557 groups. In summary, consistent with long-lasting effects on CA1 network activity, Keta/Xyl, and  
558 MMF impaired episodic-like memory consolidation. In contrast, Iso, which overall caused a  
559 weaker disturbance of neuronal population activity and a faster recovery profile, did not  
560 significantly affect memory consolidation.

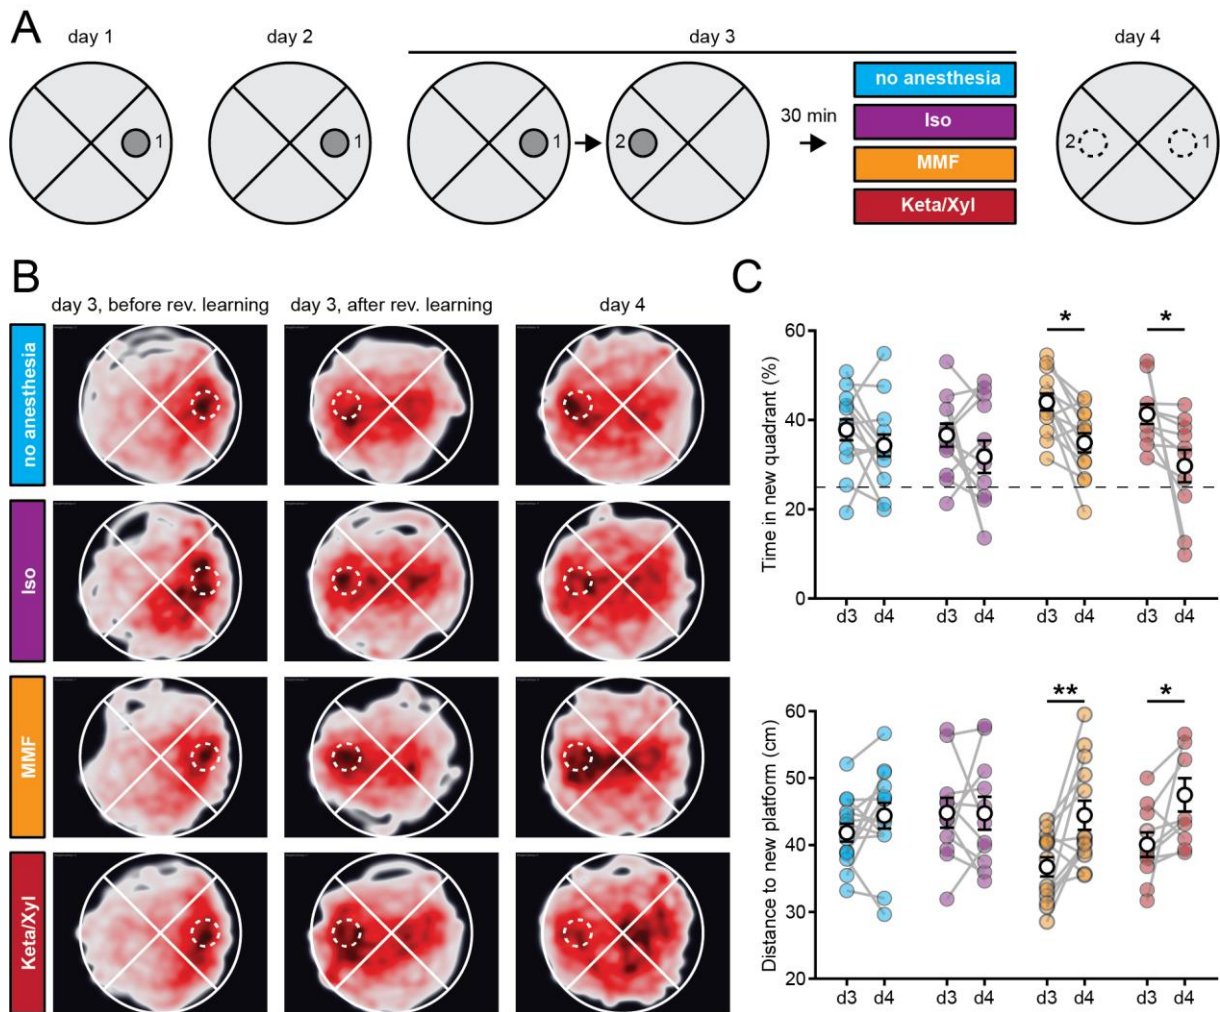

561

562 **Fig. 8. Episodic memory consolidation is impaired by MMF and Keta/Xyl, but not by Iso.** (A)  
 563 Experimental design to test episodic-like memory in a Morris water maze. On days 1 and 2 animals were  
 564 trained to find the platform in position 1. Reversal learning was performed on day 3 where animals had  
 565 to learn that the platform was moved to position 2. Training was followed 30 min later by a 1-h period of  
 566 one of the four indicated treatments per group. On day 4, consolidation of the memory for the platform  
 567 in position 2 was tested. (B) Heat maps showing trajectories of all mice during the first probe trial before  
 568 reversal learning on day 3 (left column), after reversal learning on day 3 (middle column) and after  
 569 treatment on day 4 (right column). Position of the target zone is indicated by dashed circles. (C) Scatter  
 570 plots showing quantification of time spent in the new target quadrant (top) and distance to the new  
 571 platform (bottom) after reversal learning on day 3 and on day 4. Filled, colored circles indicate individual  
 572 animals, White circles indicate mean  $\pm$  SEM. Asterisks in (C) indicate significant differences between  
 573 days. \*  $p < 0.05$ , \*\*  $p < 0.01$ .

574

## 575 DISCUSSION

576 We investigated and systematically compared the intra- and post-anesthetic effects of different  
 577 commonly used anesthetic strategies on the mouse hippocampus across multiple levels of  
 578 analysis. Despite sharing some common traits, brain and cellular network states differ  
 579 substantially under the influence of various types of anesthetics (Clark and Rosner, 1973;  
 580 Sarasso et al., 2015; Steriade et al., 1993). Indeed, at the neuronal level, compared with awake  
 581 state, all three anesthetics showed robustly reduced spiking activity in single neurons, reduced  
 582 power in high oscillation frequency band, and decorrelated cellular population activity.

583 However, the induced network states in CA1 were highly distinct between the three different  
584 conditions, with Iso leading to prominent network oscillations at around 0.1 Hz, which timed  
585 the spiking activity of single units and neuronal calcium transients. Keta/Xyl caused  
586 pronounced oscillations between 0.5 and 4 Hz and the strongest reduction in calcium  
587 dynamics. MMF, in contrast, most strongly reduced LFP and SUA and impaired population  
588 dynamics as assessed with calcium imaging. Differences were also present in the long-term  
589 effects on spine dynamics, with Keta/Xyl stabilizing spines, leading to reduced turnover and  
590 increased density. MMF, on the other hand, mildly increased spine dynamics. Keta/Xyl cannot  
591 be antagonized and therefore changes of the CA1 network mediated by this anesthetic strategy  
592 had the longest duration, in agreement with long-lasting overall changes of global animal  
593 physiology (Albrecht et al., 2014). More unexpectedly, and in contrast to overall effects on  
594 physiology (Albrecht et al., 2014), CA1 network dynamics were still disturbed long after  
595 antagonization of MMF anesthesia. These long-lasting alterations were associated with  
596 impairment of episodic memory consolidation after exposure to Keta/Xyl- or MMF, but not Iso.  
597 Thus, despite fulfilling all the hallmarks of general anesthesia, different GAs distinctly alter  
598 hippocampal network dynamics, synaptic connectivity, and memory consolidation.

### 599 **Iso, MMF and Keta/Xyl have different molecular targets and distinctly modulate** 600 **functional and structural features of CA1**

601 The GAs used here represent three different strategies based on the large repertoire of  
602 currently available anesthetics. Isoflurane represents the class of halogenated diethyl ether  
603 analogues, which are volatile and therefore administered via inhalation. Fentanyl, in  
604 combination with the analgesic medetomidine and the sedative midazolam (MMF), represents  
605 an anesthetic approach based on injection of a combination of drugs with sedative, analgesic  
606 and anxiolytic properties. In the clinic, propofol can be used instead of midazolam. Finally,  
607 ketamine is used both as an anesthetic and, at lower dosage, as a treatment against  
608 depression. For anesthesia it is combined with xylazine, which acts sedative, analgesic and as  
609 a muscle relaxant. All three strategies differ markedly in their molecular targets. Consequently,  
610 they uniquely modulate general animal physiology (Albrecht et al., 2014) and brain activity  
611 (Sarasso et al., 2015). Isoflurane is a potent GABA- and glycine receptor agonist. Moreover, it  
612 activates two-pore potassium channels and acts as  $\alpha$ -amino-3-hydroxy-5-methyl-4-  
613 isoxazolepropionic acid receptor (AMPA) inhibitor (Alkire et al., 2008). Similar to Iso,  
614 midazolam, the hypnotic component of the MMF mix, mainly acts as a GABAR agonist with  
615 little effect on NMDARs. In contrast, ketamine is a potent, use-dependent NMDAR blocker with  
616 less pronounced effects on potassium channels, GABA, glycine and other glutamate receptors  
617 such AMPA or kainite receptors (Alkire et al., 2008). Moreover, while most anesthetics reduce  
618 activity of thalamic nuclei, ketamine increases thalamic drive (Langsjo et al., 2005), leading to  
619 enhanced rather than reduced oscillations in mid-to-high frequency bands such as theta and  
620 gamma (Lee et al., 2013; Soltesz and Deschenes, 1993). In accordance with this, our study  
621 reveals major differences in the action of the different anesthetics on functional and structural  
622 features of CA1. With both electrical recordings and calcium imaging we report a robust  
623 reduction of neuronal spiking and pairwise neuronal correlation. Notably, effects on electrical  
624 activity and calcium activity were well in line for both Iso and MMF, despite the different  
625 recording methods. However, we observed some divergence for Keta/Xyl.

### 626 **Comparison of electrophysiological recordings and calcium imaging**

627 Generally, differences in electrophysiological recordings and calcium imaging data may stem  
628 from the location where the signal is detected. In the calcium imaging experiments, the signal

629 was sampled in a horizontal plane located inside and parallel to stratum pyramidale of CA1. In  
630 this configuration, somatic, action-potential driven calcium transients mainly from pyramidal  
631 neurons dominate the signal. Due to the kinetics and calcium-binding properties of GCaMP6f,  
632 action potentials can only be resolved below approx. 5 Hz and are reported non-linearly (Chen  
633 et al., 2013). In contrast, the electrodes on linear probes are arranged orthogonally to the strata  
634 of CA1 and parallel to the dendrites of CA1 cells. Thus, synaptic potentials mainly constitute  
635 the LFP across all layers and spikes are picked up from both pyramidal cells (in stratum  
636 pyramidale) and GABAergic neurons in all layers. Moreover, the first method samples neurons  
637 that spatially distribute over a large area. In contrast, the second one is biased towards large,  
638 active neurons that are in close proximity of the electrode.

639 More specifically, under Keta/Xyl, the overall firing rate of single units showed the smallest  
640 reduction of all three anesthetics. At the same time, imaging revealed the most substantial  
641 reduction in rate, amplitude and duration of calcium transients (compare Fig. 2B and 3D). One  
642 reason for this discrepancy may be the inhibitory action of ketamine on NMDARs. CA1  
643 pyramidal cells display large, NMDAR-driven dendritic plateau potentials and calcium spikes  
644 (Katz et al., 2009). Moreover, ketamine likely inhibits L-type voltage-gated calcium channels  
645 (Yamakage et al., 1995) and reduces burst firing (Yang et al., 2018), leading to calcium  
646 transients with reduced amplitude and a faster decay constant. In contrast, ketamine has little  
647 influence on sodium spikes and AMPAR-mediated synaptic potentials, which are detected in  
648 electrical recordings as SUA and LFP, respectively. In accordance with electrical recordings,  
649 calcium transients showed increased power at 0.1-0.2 Hz under Iso. However, we did not  
650 detect a clear peak at 1-4 Hz in the presence of Keta/Xyl, as seen in LFP and SUA, probably  
651 due to its strongly dampening effect on calcium transients. The (low-pass) filtering of neuronal  
652 activity imposed by calcium indicators might also play a role.

653 Notably, the differences between electrical recordings and calcium imaging under Keta/Xyl are  
654 relevant. Calcium is a second messenger central to neuronal plasticity and metabolism (West  
655 et al., 2002; Wiegert and Bading, 2011). NMDARs are a major source for activity-dependent  
656 calcium entry into the cell, involved in regulating synaptic plasticity, metabolism, and pathology  
657 (Hardingham and Bading, 2010). The present findings suggest that Keta/Xyl has a particularly  
658 strong effect on neuronal calcium activity, uncoupling action potential firing from associated  
659 cytosolic calcium transients, leading to reduced intracellular calcium signaling. In contrast,  
660 calcium transients under MMF and Iso anesthesia closely matched the electrical activity profile  
661 of neurons. Therefore, aside from overall effects on network activity, Keta/Xyl may selectively  
662 alter neuronal plasticity by suppressing NMDAR-dependent postsynaptic calcium signals.

### 663 **In contrast to neocortex, GAs decorrelate neuronal activity in CA1**

664 All anesthetics decorrelated neuronal activity in CA1, leading to an overall more fragmented  
665 network state. This is in stark contrast with what has been reported from studies on GAs and  
666 cortical activity both at adulthood (Goltstein et al., 2015; Greenberg et al., 2008; Wenzel et al.,  
667 2019) and during development (Chini et al., 2019). This discrepancy may arise from the distinct  
668 architecture of CA1 compared to L2/3 of the neocortex, the latter showing a high degree of  
669 local interconnectivity (Harris and Mrsic-Flogel, 2013). In CA1 this is not the case. Pyramidal  
670 cells receive their main excitatory input from CA3 and entorhinal cortex and send their efferents  
671 to subiculum and extrahippocampal areas without making local connections among each other  
672 (Neves et al., 2008). Afferent activity originating in various sources and converging in CA1,  
673 may arrive out-of-phase under anesthesia, leading to desynchronized firing of CA1 pyramidal  
674 cells. Such a phenomenon has been proposed as a candidate mechanism underlying

675 desynchronization of neuronal firing in basal ganglia under conditions of slow oscillations  
676 (slow-wave sleep) and high synchrony in the neocortex (Mizrahi-Kliger et al., 2018). Notably,  
677 pairwise correlation was not entirely independent of the distance between neurons.  
678 Synchronization of pyramidal neurons via local, GABAergic interneurons may be another factor  
679 that increases spatial correlations. Both in neocortex and hippocampus, various types of  
680 GABAergic interneurons locally connect to and synchronize pyramidal neurons such as basket  
681 or bistratified cells (Klausberger and Somogyi, 2008).

682 Coordinated neuronal network dynamics, including pairwise correlation of calcium transients  
683 and single units, population coupling, clustering in the temporal and spatial domain were  
684 consistently impaired most strongly with Keta/Xyl and MMF. Iso, both in electrophysiological  
685 as well as calcium recordings, showed the mildest effects and permitted hippocampal activity  
686 patterns that closely resembled the awake state. Iso and MMF, in contrast to Keta/Xyl, are  
687 thought to be immediately reversible (Albrecht et al., 2014). However, they showed significant  
688 disruption of network dynamics for at least 45 min after reversal. Thus, all anesthetics had a  
689 much longer effect on network activity than expected. We therefore further asked whether this  
690 is reflected in long-term effects of these different types of anesthetics on spine dynamics of  
691 CA1 pyramidal neurons. Recent studies investigating spine dynamics at CA1 pyramidal  
692 neurons came to incongruent conclusions reporting spine turnover ranging from 3% (Gu et al.,  
693 2014) over 12% (Attardo et al., 2015) to approx. 80% (Pfeiffer et al., 2018) over 4 days.  
694 However, all studies used either isoflurane (Attardo et al., 2015) or ketamine/xylazine-based  
695 (Gu et al., 2014; Pfeiffer et al., 2018) anesthesia during the repeated imaging sessions. Thus,  
696 to what extent anesthesia itself influences spine dynamics is not clear.

### 697 **Iso, MMF and Keta/Xyl distinctly alter spine dynamics in CA1**

698 More generally, various effects of general anesthesia on spine dynamics were reported,  
699 depending on the brain region, preparation, age of the animal and anesthetic strategy. For  
700 example, enhanced synaptogenesis has been reported with different types of anesthetics on  
701 cortical and hippocampal neurons during development (Briner et al., 2010; De Roo et al.,  
702 2009). In contrast, one study indicated that spine dynamics were not altered on cortical  
703 neurons of adult mice with Keta/Xyl or Iso (Yang et al., 2011), while another study  
704 demonstrated an increase in spine density in somatosensory cortex with ketamine  
705 (Pryazhnikov et al., 2018). Also, fentanyl-mediated, concentration-dependent bidirectional  
706 modulations of spine dynamics were reported in hippocampal cultures (Lin et al., 2009).

707 To systematically compare spine dynamics in CA1 in vivo under different anesthetic  
708 treatments, we imaged spines at basal, oblique and tuft dendrites in a large set of dendrites.  
709 We found small, but robust chronic effects of repeated anesthesia. Keta/Xyl decreased spine  
710 turnover leading to a mild increase in spine density over time by stabilizing existing spines.  
711 This observation agrees with recent studies that showed a stabilizing effect of ketamine in the  
712 somatosensory cortex, resulting in increased spine density (Pryazhnikov et al., 2018). Thus,  
713 repeated anesthetic doses of Keta/Xyl may limit overall synaptic plasticity and thus, spine  
714 turnover. It was further shown that sub-anesthetic, antidepressant doses of ketamine enhance  
715 spine density in the prefrontal cortex (Li et al., 2010; Phoumthippavong et al., 2016), similar  
716 to our study for CA1 neurons. Iso and MMF had contrasting effects on spine dynamics  
717 compared to Keta/Xyl, mildly enhancing spine turnover, which might be explained by, the their  
718 different pharmacology compared to ketamine, as pointed out above. A second aspect that  
719 distinguishes Keta/Xyl from Iso and MMF is its irreversibility, which might lead to longer-lasting  
720 alterations of synaptic transmission and E/I ratios leading to differential spine dynamics. This

721 idea is supported by the observation that during the anesthesia period itself, spine turnover  
722 was not altered, suggesting that long-lasting and repeated disturbances are required to leave  
723 a mark in synaptic connectivity.

#### 724 **MMF and Keta/Xyl, but not Iso, retrogradely affect episodic-like memory formation**

725 Notably, a single dose of anesthesia with Keta/Xyl and MMF, but not Iso disrupted memory  
726 consolidation using a water maze assay in adult mice. Our results appear at odds with a reports  
727 (Zurek et al., 2012), where a single, 1-h treatment with Iso caused deficits in the formation of  
728 contextual fear memory, object recognition memory and in the Morris water maze in the  
729 following 48 h. However, this study investigated memory acquisition after anesthesia (i.e.  
730 anterograde amnesia), while our study asked whether anesthesia affects the consolidation of  
731 a memory formed shortly before the treatment (i.e. retrograde amnesia). The induction of  
732 retrograde amnesia correlated with the magnitude and duration of CA1 network disturbance  
733 imposed by the various anesthetics. KetaXyl and MMF most strongly decorrelated CA1  
734 network activity and these disruptions recovered only slowly, compared to Iso.

735 Changes in synaptic connections are considered essential for memory formation and storage  
736 (Frey and Morris, 1997; Kasai et al., 2010; Segal, 2005; Yang et al., 2009). Despite, a small  
737 effect on spine dynamics, the strong and lasting disturbance of hippocampal network activity  
738 in CA1 (and most likely other brain areas) by Keta/Xyl and MMF was sufficient to interfere with  
739 memory consolidation. The chronic alterations of spine turnover, especially by Keta/Xyl, may  
740 therefore indicate that repeated anesthesia can impact long-lasting hippocampus-dependent  
741 memories. To establish a direct link between spine dynamics, network disruptions and  
742 memory, future studies are required that investigate both spine turnover and changes in  
743 population coupling at hippocampal neurons causally involved in memory formation and  
744 maintenance.

745 Taken together, we report a novel effect of anesthesia on brain dynamics, namely  
746 fragmentation of network activity in hippocampus. We consistently observe this phenomenon  
747 across multiple levels of analysis. This unique response compared to the cortex may underlie  
748 its high sensitivity to anesthesia including its central role in amnesia. The extent, duration, and  
749 reversibility of network fragmentation depends on the GA used. Therefore, this study may help  
750 guide the choice of an appropriate anesthetic strategy, dependent on experimental  
751 requirements and constraints, especially in the neurosciences. More generally, our findings  
752 might also have relevance for the clinic. Postoperative delirium, a condition that involves  
753 memory loss, is still an unresolved mystery. Minimizing the disturbance of hippocampal  
754 function may be one building block to overcome this undesired condition.

755

## 756 **AUTHOR CONTRIBUTIONS**

757 Conceptualization, W.Y., M.C., J.S.W.; Methodology, W.Y., M.C., J.A.P., A.F., F.M., O.S.,  
758 I.L.H.-O., J.S.W.; Analysis, W.Y., M.C., A.F., J.A.P., P.P., C.R., F.M., J.S.W.; Investigation ,  
759 W.Y., J.A.P.; Data Curation, W.Y., M.C., J.A.P., A.F.; Writing, W.Y., M.C., O.S., I.L.H.-O.,  
760 J.S.W.; Visualization, W.Y., M.C., A.F., J.S.W.; Supervision, F.M., I.L.H.-O., J.S.W.; Project  
761 Administration, J.S.W.; Funding Acquisition, W.Y., A.F., I.L.H.-O., J.S.W.

## 762 **ACKNOWLEDGEMENTS**

763 We thank Stefan Schillemeit and Kathrin Sauter for technical assistance and Thomas G.  
764 Oertner and Amit Marmelstein for critical feedback on the manuscript. This work was funded  
765 by the Deutsche Forschungsgemeinschaft (DFG, SPP1926/FOR2419/P6, SFB963/B8 to  
766 J.S.W., SPP 1665/Ha 4466/10-1/Ha4466/12-1, SFB 936/B5 to I.L.H.-O.), the European  
767 Research Council (ERC2016-StG-714762 to J.S.W., ERC-2015-CoG 681577 to I.L.H.-O.), the  
768 German Academic Exchange Service (DAAD, STG/19/5744091 to A.F.), and the Chinese  
769 Scholarship Council (CSC 201606210129 to W.Y.).

## 770 **DECLARATION OF INTERESTS**

771 The authors declare no competing interests.

## 772 **STAR METHODS**

### 773 **Key Resources Table**

### 774 **Resource Availability**

#### 775 Lead Contact

776 Further information and requests for resources and reagents should be directed to and will  
777 be fulfilled by the Lead Contact, J. Simon Wiegert ([simon.wiegert@zmnh.uni-hamburg.de](mailto:simon.wiegert@zmnh.uni-hamburg.de)).

#### 778 Materials Availability

779 This study did not generate new unique reagents.

#### 780 Data and Code Availability

781 The code generated during this study is available at  
782 <https://github.com/OpatzLab/HanganuOpatzToolbox> and [https://github.com/mchini/Calcium-](https://github.com/mchini/Calcium-Imaging---Anesthesia)  
783 [Imaging---Anesthesia](https://github.com/mchini/Calcium-Imaging---Anesthesia)

784 The calcium imaging and electrophysiology data sets generated during this study are  
785 available at [https://gin.g-node.org/SW\\_lab/Anesthesia\\_CA1](https://gin.g-node.org/SW_lab/Anesthesia_CA1)

## 786 **Experimental Model and Subject Details**

### 787 Mice

788 Adult C57BL/6J mice and transgenic Thy1-GFP-M mice of both sexes were housed and bred  
789 in pathogen-free conditions at the University Medical Center Hamburg-Eppendorf. The  
790 light/dark cycle was 12/12 h and the humidity and temperature were kept constant (40%  
791 relative humidity; 22°C). Food and water were available ad libitum. All procedures were  
792 performed in compliance with German law according and the guidelines of Directive  
793 2010/63/EU. Protocols were approved by the Behörde für Gesundheit und Verbraucherschutz  
794 of the City of Hamburg.

## 795 **Method Details**

### 796 Hippocampal recording-window surgery and in-vivo electrophysiology

797 Chronic multisite extracellular recordings were performed in dorsal CA1. The adapter for head  
798 fixation was implanted at least 4 days before recordings. Mice were anesthetized via  
799 intraperitoneal injection of midazolam/medetomidine/fentanyl (MMF) and placed on a heating  
800 blanket to maintain the body temperature. Eyes were covered with eye ointment (Vidisic,  
801 Bausch + Lomb) to prevent drying. Prior to surgery, the depth of anesthesia and analgesia was  
802 evaluated with a toe-pinch to test the paw-withdrawal reflex. Subsequently, mice were fixed in  
803 a stereotactic frame, the fur was removed with a fine trimmer and the skin of the head was  
804 disinfected with Betaisodona. After removing the skin, 0.5% bupivacaine / 1% lidocaine was  
805 locally applied to cutting edges. A metal head-post (Neurotar) was attached to the skull with  
806 dental cement (Super Bond C&B, Sun Medical) and a craniotomy was performed above the to  
807 the dorsal CA1 area (– 2.0 mm AP, ± 1.3 mm ML relative to Bregma) which was subsequently  
808 protected by a customized synthetic window filled with Kwik-Cast sealant (World Precision  
809 Instruments). After recovery from anesthesia, mice were returned to their home cage and were  
810 provided with Meloxicam mixed into soft food for 3 days. After recovery from the surgery, mice  
811 were accustomed to head-fixation and trained to move in the Mobile HomeCage system  
812 (Neurotar). For recordings, craniotomies were reopened by removal of the Kwik-Cast sealant  
813 and multi-site electrodes (NeuroNexus, MI, USA) were inserted into the dorsal CA1 (one-  
814 shank, A1x16 recording sites, 50 µm spacing, 1.6 mm deep). A silver wire served as ground  
815 and reference in the craniotomy between skull and brain tissue. Extracellular signals were  
816 band-pass filtered (0.1-8000 Hz) and digitized (32 kHz) with a multichannel extracellular  
817 amplifier (Digital Lynx SX; Neuralynx). The same animals were recorded weekly under different  
818 anesthesia. After 15 min of non-anesthetized recording, mice received a subcutaneous  
819 injection of Keta/Xyl, MMF or inhalation of Iso in a pseudo-randomized order. The following  
820 drug combinations were administered: 2.0 % isoflurane in 100% O<sub>2</sub>; 130 mg/kg ketamine, 10  
821 mg/kg xylazine s.c.; 5.0 mg/kg midazolam, 0.2 mg/kg medetomidine and 0.05 mg/kg fentanyl  
822 s.c.; and for complete reversal of anesthesia, 0.5 mg/kg flumazenil, 2.5 mg/kg atipamezole and  
823 0.1 mg/kg buprenorphine s.c. Recordings were continued for 1.5 h. After recordings  
824 craniotomy was closed and mice were returned to their home cage. Electrode position was  
825 confirmed in brain slices postmortem.

### 826 Virus injection and hippocampal window surgery for in vivo calcium imaging

827 C57BL/6J wild-type mice were anesthetized via intraperitoneal injection of  
828 midazolam/medetomidine/fentanyl (MMF) and placed on a heating blanket to maintain the  
829 body temperature. Eyes were covered with eye ointment (Vidisic, Bausch + Lomb) to prevent  
830 drying. Prior to surgery, the depth of anesthesia and analgesia was evaluated with a toe-pinch  
831 to test the paw-withdrawal reflex. Subsequently, mice were fixed in a stereotactic frame, the  
832 fur was removed with a fine trimmer and the skin of the head was disinfected with Betaisodona.  
833 The skin was removed by a midline scalp incision (1-3 cm), the skull was cleaned using a bone  
834 scraper (Fine Science Tools) and a small hole was drilled with a dental drill (Foredom) above  
835 the injection site. AAV2/7-syn-GCaMP6f was targeted unilaterally to the dorsal CA1 area (–  
836 2.0 mm AP, ± 1.3 mm ML, – 1.5 mm DV relative to Bregma). 0.6 µl of virus suspension was  
837 injected. All injections were done at 100 nl\*min<sup>-1</sup> using a glass micropipette. After the injection,  
838 the pipette stayed in place for at least 5 min before it was withdrawn and the scalp was closed  
839 with sutures. For complete reversal of anesthesia, mice received a subcutaneous dose of  
840 Flumazenil, Atipamezol and Buprenorphine (FAB). During the two days following surgery  
841 animals were provided with Meloxicam mixed into soft food. Two weeks after virus injection,



842 mice were anesthetized as described above to implant the hippocampal window. After fur  
843 removal, skin above the frontal and parietal bones of the skull was removed by one horizontal  
844 cut along basis of skull and two rostral cuts. The skull was cleaned after removal of the  
845 periosteum, roughened with a bone scraper and covered with a thin layer of cyanoacrylate  
846 glue (Pattex). After polymerization a 3-mm circle was marked on the right parietal bone  
847 (anteroposterior, -2.2 mm; mediolateral, +1.8 mm relative to bregma) with a biopsy punch and  
848 the bone was removed with a dental drill (Foredom). The dura and somatosensory cortex  
849 above the hippocampus were carefully aspirated until the white matter tracts of the corpus  
850 callosum became visible. The craniotomy was washed with sterile PBS and a custom-built  
851 imaging window was inserted over the dorsal hippocampus. The window consisted of a hollow  
852 glass cylinder (diameter: 3 mm, wall thickness: 0.1 mm, height: 1.8 mm) glued to a No. 1  
853 coverslip (diameter: 3mm, thickness: 0.17 mm) on the bottom and to a stainless-steel rim on  
854 the top with UV-curable glass glue (Norland NOA61). The steel rim and a head holder plate  
855 (Luigs & Neumann) were fixed to the skull with cyanoacrylate gel (Pattex). After polymerization,  
856 cranial window and head holder plate were covered with dental cement (Super Bond C&B,  
857 Sun Medical) to provide strong bonding to the skull bone. Following the surgery, animals were  
858 provided with Meloxicam mixed into soft food for 3 days. The position of the hippocampal  
859 window was confirmed in brain slices postmortem.

#### 860 Two-photon calcium imaging in anesthetized and awake mice

861 The same animals were sequentially imaged under Keta/Xyl, MMF or Iso in a pseudo-  
862 randomized order (for details see above). After losing the righting reflex, generally 5–10 min  
863 after application of the anesthetics, the animals were positioned on a heating-pad to maintain  
864 body temperature at approximately 37°C during anesthesia. The intensity of anesthesia and  
865 evaluation of the different stages of anesthesia were assessed by recording the presence or  
866 absence of distinct reflex responses: righting reflex, palpebral reflex, toe-pinch reflex. Between  
867 each imaging session, mice were allowed to recover for one week.

868 Anesthetized mice were head fixed under the microscope on a heated blanket to maintain body  
869 temperature. Eyes were covered with eye ointment (Vidisic, Bausch + Lomb) to prevent drying.  
870 The window was centered under the two-photon microscope (MOM-scope, Sutter Instruments,  
871 modified by Rapp Optoelectronics) and GCaMP6f expression was verified in the hippocampus  
872 using epi fluorescence. Images were acquired with a 16x water immersion objective (Nikon  
873 CFI75 LWD 16X W, 0.80 NA, 3.0 mm WD). For awake imaging we used a linear treadmill,  
874 which allowed imaging during quiet and running states. 5-min-timelapse images were acquired  
875 every 10 minutes for a period of 50 minutes. Image acquisition was carried out with a Ti:Sa  
876 laser (Chameleon Vision-S, Coherent) tuned to 980 nm to excite GCaMP6f. Single planes  
877 (512x512 pixels) were acquired at 30 Hz with a resonant-galvanometric scanner at 29-60 mW  
878 (980 nm) using ScanImage 2017b (Vidrio). Emitted photons were detected by a pair of  
879 photomultiplier tubes (H7422P-40, Hamamatsu). A 560 DXCR dichroic mirror and 525/50 and  
880 607/70 emission filters (Chroma Technology) were used to separate green and red  
881 fluorescence. Excitation light was blocked by short-pass filters (ET700SP-2P, Chroma). For  
882 the repetitive imaging, the position of the field of view (FOV) was registered in the first imaging  
883 session with the help of vascular landmarks and cell bodies of CA1 pyramidal neurons. This  
884 allowed for subsequent retrieval of the FOV for each mouse.

#### 885 Two-photon spine imaging in anesthetized and awake mice

886 3 - 4 weeks after window implantation, chronic spine imaging started in Tg(Thy1-EGFP)MJrs/J  
887 mice with the first of a total of four imaging series (see Fig. S11A). Each imaging series was

888 done under one of the three anesthetic conditions (Iso, Keta/Xyl, MMF, see above for details)  
889 or during wakefulness. Within one series, mice were imaged 5 times every 4 days. Afterwards,  
890 mice were allowed to recover for three to four weeks until the next imaging series under a  
891 different anesthetic condition was started. Thus, each experiment lasted approx. 5 months. To  
892 avoid time-dependent effects, anesthetic conditions were pseudo-randomized (see Fig. S11A).  
893 For imaging sessions under anesthesia mice were head fixed under the microscope on a  
894 heated blanket to maintain body temperature. Eyes were covered with eye ointment (Vidisic,  
895 Bausch + Lomb) to prevent drying. The window was centered under the two-photon  
896 microscope (MOM-scope, Sutter Instruments, modified by Rapp Optoelectronics) and GFP  
897 expression was verified in the hippocampus using epi-fluorescence. Image acquisition was  
898 carried out with a Ti:Sa laser (Chameleon Vision-S, Coherent) tuned to 980 nm to excite GFP.  
899 Images were acquired with a 40x water immersion objective (Nikon CFI APO NIR 40X W, 0.80  
900 NA, 3.5 mm WD). Single planes (512x512 pixels) were acquired at 30 Hz with a resonant  
901 scanner at 10-60 mW (980 nm) using ScanImage 2017b. Before the first imaging session, we  
902 registered the field of views with the help of vascular landmarks and cell bodies of CA1  
903 pyramidal neurons and selected several regions for longitudinal monitoring across the duration  
904 of the time-lapse experiment. Each of these regions contained between 1 and 2 dendritic  
905 segments visibly expressing GFP. The imaging sessions lasted for max 60 min and mice were  
906 placed back to their home cages where they woke up.

#### 907 Morris Water Maze

908 We designed a protocol for reversal learning in the spatial version of the water maze to assess  
909 the possible effects of the different anesthetics on episodic-like memory in mice (Chen et al.,  
910 2000; Morellini, 2013). The water maze consisted of a circular tank (145 cm in diameter) circled  
911 by dark curtains and walls. The water was made opaque by the addition of non-toxic white  
912 paint such that the white platform (14 cm diameter, 9 cm high, 1 cm below the water surface)  
913 was not visible. Four landmarks (35 X 35 cm) differing in shape and grey gradient were  
914 positioned on the wall of the maze. Four white spotlights on the floor around the swimming  
915 pool provided homogeneous indirect illumination of 60 lux on the water surface. Mice were first  
916 familiarized for one day to swim and climb onto a platform (diameter of 10 cm) placed in a  
917 small rectangular maze (42.5 x 26.5 cm and 15.5 cm high). During familiarization, the position  
918 of the platform was unpredictable since its location was randomized, and training was  
919 performed in darkness. After familiarization, mice underwent three learning days, during which  
920 they had to learn the location of a hidden platform. The starting position and the side of the  
921 maze from which mice were taken out of the maze were randomized. At day 1 mice underwent  
922 four learning trials (maximum duration of 90 seconds, inter-trial interval of 10 minutes). After  
923 staying on the platform for 15 s, mice were returned to their home cage and warmed up under  
924 red light. On day 2, mice underwent two training trials before they performed a 60 seconds-  
925 long probe trial to assess their searching strategy. Afterwards, one additional training trial was  
926 used to re-consolidate the memory of the platform position. On day 3 the long-term memory of  
927 the platform position was tested with a 45-seconds long probe trial, followed by another training  
928 trial with the platform in place to avoid extinction. Then mice underwent four reversal learning  
929 trials with the platform located in the quadrant opposite to the one in which the platform was  
930 during the previous training trials. To assess whether the mice learned the new platform  
931 position, mice underwent a 60-seconds long probe trial to followed by one more training trial  
932 to consolidate the memory of the new location. One hour after the last reversal learning trial,  
933 mice were anesthetized to analyze the effects of the anesthesia on the consolidation of the  
934 memory of the new platform position. Mice were assigned to four groups with an equal average  
935 performance during the probe trial on day 2. Each group was subjected to different conditions:

936 one-hour Iso anesthesia, one-hour MMF anesthesia, Keta/Xyl anesthesia (which was not  
937 antagonized), and one group was left untreated. On day 4, mice underwent a 60-seconds long  
938 probe trial to evaluate their searching strategies, namely, the “episodic-like memory” of the  
939 reversal learning trials performed one hour before having been anesthetized on day 3 (see Fig.  
940 8A).

## 941 **Quantification and Statistical Analysis**

### 942 *Electrophysiology*

943 In vivo electrophysiology data were analyzed with custom-written scripts in the Matlab  
944 environment available at <https://github.com/mchini/HanganuOpatzToolbox>. Data were band-  
945 pass filtered (1-100 Hz or 0-100 Hz for low frequency LFP analysis) using a third-order  
946 Butterworth forward and backward filter to preserve phase information before down-sampling  
947 to analyze LFP.

948 *Detection of active periods.* Active periods were detected with an adapted version of an  
949 algorithm for ripple detection  
950 ([https://github.com/buzsakilab/buzcode/blob/master/detectors/detectEvents/bz\\_FindRipples.](https://github.com/buzsakilab/buzcode/blob/master/detectors/detectEvents/bz_FindRipples.m)  
951 [m](#)). Briefly, active periods were detected on the band-pass filtered (4-20 Hz) normalized  
952 squared signal using both absolute and relative thresholds. We first passed the signal through  
953 a boxcar filter and then performed hysteresis thresholding: we first detected events whose  
954 absolute or relative power exceeded the higher threshold, and considered as belonging to the  
955 same event all data points that were below the lower (absolute or relative) threshold. Absolute  
956 thresholds were set to 7 and 15  $\mu\text{V}$ , relative thresholds to 1 and 2. Periods were merged if  
957 having an inter-period interval shorter than 900 ms, and discarded if lasted less than 500 ms.  
958 Percentage of active periods was calculated for 15 min bins. Timestamps were preserved for  
959 further analysis.

960 *Power spectral density.* Power spectral density was calculated on 30 s-long windows of 0-100  
961 Hz filtered signal using Welch’s method with a signal overlap of 15 s.

962 *Modulation index (MI).* Modulation index was calculated as (value anesthesia - value pre-  
963 anesthetized) / (value anesthesia + value pre-anesthetized).

964 *Power law decay exponent of the LFP power spectrum.* The 1/f slope was computed as in  
965 (Gao et al., 2017). We used robust linear regression (Matlab function *robustfit.m*) on the log10  
966 of the LFP power spectrum in the 30-50 Hz frequency range.

967 *Phase-amplitude coupling (PAC).* PAC was calculated on 0-100 Hz filtered full signal using the  
968 PAC toolbox based on modulation index measure (Onslow et al., 2011). Range of phase vector  
969 was set to 0-8 Hz and range of amplitude vector was set to 20-100 Hz. Significant coupling  
970 was calculated in comparison to a shuffled dataset. Non-significant values were rejected.

971 *Single unit analysis.* Single unit activity (SUA) was detected and clustered using klusta  
972 (Rossant et al., 2016) and manually curated using phy (<https://github.com/cortex-lab>).

973 *Active units:* the recording was divided into 15-minute bins. Single units were considered to be  
974 active in the time interval if they fired at least five times.

975 *Pairwise phase consistency.* Pairwise phase consistency (PPC) was computed as previously  
976 described (Vinck et al., 2010). Briefly, the phase in the band of interest was extracted as  
977 mentioned above, and the mean of the cosine of the absolute angular distance (dot product)  
978 among all single unit pairs of phases was calculated.

979 *Unit Power.* SUA spike trains of each recording were summed in a population vector, and  
980 power spectral density was calculated on 30 s-long windows using Welch's method with a  
981 signal overlap of 15 s. The resulting power spectra were normalized by the firing rate in that  
982 window.

983 *Spike-Time tiling coefficient (STTC)* was computed as previously described (Cutts and Eglen,  
984 2014). Briefly, we quantified the proportion ( $P_A$ ) of spikes of spike train A that fall within  $\pm\Delta t$  of  
985 a spike from spike train B. To this value we subtract the proportion of time that occurs within  
986  $\pm\Delta t$  of spikes from spike train B ( $T_B$ ). This is then divided by 1 minus the product of these two  
987 values. The same is then applied after inverting spike train A and B, and the mean between  
988 the two values is kept.

$$989 \quad STTC = \frac{1}{2} \left( \frac{P_A - T_B}{1 - P_A T_B} + \frac{P_B - T_A}{1 - P_B T_A} \right)$$

990 Importantly, this coefficient has several desirable properties. It is bounded between -1 and 1.  
991 It is symmetric with respect to the two spike trains. Computing it over different timescales is  
992 readily done by controlling the value of the parameter " $\Delta t$ ". Lastly, and most importantly,  
993 traditionally used methods of assessing correlations between pairs of spike trains show an  
994 inverse correlation between their value and firing rate, due to the fact that spiking is sparse  
995 with respect to the sampling frequency, and therefore quiescent period in both spike trains  
996 artificially increase the correlation. This is not the case for the spike-time tiling coefficient (Cutts  
997 and Eglen, 2014). Given that there are large differences in the average firing rate of our  
998 conditions, we chose STTC analysis over pure correlation analysis to circumvent this major  
999 bias. On the flipside, STTC cannot be straightforwardly applied to negative correlations, that  
1000 were therefore not investigated in SUA data.

#### 1001 Calcium imaging data

1002 In vivo calcium imaging data were analyzed with custom-written scripts in the Python and  
1003 Matlab environment available at <https://github.com/mchini/Calcium-Imaging---Anesthesia>.

1004 *Alignment of multiple recordings.* To track the activity of the same set of neurons in different  
1005 anesthetic conditions and during wakefulness, we acquired two-photon time series of a defined  
1006 field of view for each animal and each condition across multiple weeks. Over such long time  
1007 periods, the field of view was susceptible to geometrical transformations from one recording to  
1008 another and thus, any two time series were never perfectly aligned. This problem scaled with  
1009 time that passed between recordings. However, optimal image alignment is critical for the  
1010 successful identification and calcium analysis of the same neurons across time (Rose et al.,  
1011 2016; Sheintuch et al., 2017).

1012 To address this problem, we developed an approach based on the `pystackreg` package, a  
1013 Python implementation of the ImageJ extension TurboReg/StackReg (Thevenaz et al., 1998).  
1014 The source code that reproduces the procedure described in this section is available on github  
1015 (<https://pypi.org/project/pystackreg/>). The `pystackreg` package is capable of using different  
1016 combinations of geometrical transformations for the alignment. We considered rigid body  
1017 (translation + rotation + scaling) and affine (translation + rotation + scaling + shearing)  
1018 transformation methods, which we applied to mean and enhanced-mean intensity images  
1019 generated by Suite2p during the registration of each single recording. We performed the  
1020 alignment using all four combinations (2 transformations x 2 types of images) choosing the one  
1021 with the best performance according to the following procedure. Squared difference between  
1022 the central part of a reference and aligned image served as a distance function  $d$  to quantify

1023 the alignment (since the signal is not always present on the borders of the image they were  
1024 truncated):

$$1025 \quad d = \sum_{i,j}^{Tranc. \text{ images}} (x_{i,j}^{ref} - x_{i,j}^{aligned})^2,$$

1026 where  $x_{i,j}^{ref}$  and  $x_{i,j}^{aligned}$  are intensities of the pixel with coordinates  $i, j$  of the reference and  
1027 aligned images. The combination with the smallest score was chosen for the final  
1028 transformation. In some rare cases, the algorithm of the alignment did not converge for a given  
1029 transformation method and image type (mean or enhanced-mean), crumbling the aligned  
1030 image in a way that most of the field of view remained empty. This combination may have the  
1031 smallest distance function  $d$  and may be falsely identified as the best one. To overcome this  
1032 issue, an additional criterion was applied, which requires the central part of the aligned picture  
1033 to contain more than 90 % of the non-empty pixels. The overall performance of the algorithm  
1034 was verified by visual inspection. An example of the alignment of two recordings is shown in  
1035 Fig. S5. The alignment for all recordings of an example mouse is demonstrated in a  
1036 supplementary video (Supplementary\_video\_37529\_aligned\_recordings.avi).

1037 In case of relatively small distortions across recordings, for example, when consecutive  
1038 acquisitions were done within one imaging session, registration can alternatively be performed  
1039 simultaneously with ROI detection in Suite2p by concatenating those TIFF-stacks. In this  
1040 approach, every ROI is automatically labeled with the same identification number across all  
1041 recordings.

1042 *Identification of the same neurons across different recordings & unique neuron ID assignment.*  
1043 After the alignment procedure, we set out to identify neurons which were active across multiple  
1044 recordings (and thus, multiple conditions). To achieve this, we developed an algorithm similar  
1045 to the one described in Sheintuch. et al. 2017 (Sheintuch et al., 2017)

1046 The algorithm processes in series all recordings for a given animal and assigns unique  
1047 identification (ID) numbers to each ROIs of every recording. Since the recordings under Iso-  
1048 anesthesia had the largest number of active neurons, we chose the first recording of this  
1049 condition as reference. We assigned IDs that ranged from 1 to the total amount of neurons to  
1050 all the ROIs of this recording. For every other recording of each mouse, Neuron ID assignment  
1051 consisted of: 1. comparison of the properties (details below) of each ROI with each ROI that  
1052 had already been processed. 2a. If the properties of the ROI matched the properties of an ROI  
1053 from a previously analyzed recording, the ROI received the same Neuron ID. 2b. If no match  
1054 was found, a new (in sequential order) Neuron ID was assigned to the ROI. In order to be  
1055 identified as representing the same neuron in two different recordings, two ROIs had to respect  
1056 the following criteria: the distance between their centroids had to be below 3  $\mu\text{m}$ , and the  
1057 overlap between their pixels had to be above 70%. An example of the identification of unique  
1058 neuron pairs in two recordings is presented in Fig. S6A. The thresholds were chosen based  
1059 on the distribution of the distances between centroids and percentage of the overlaps. An  
1060 example for a single mouse is graphically illustrated in Fig. S6B. Both properties have a clearly  
1061 bimodal distribution (similar to (Sheintuch et al., 2017)) with cutoffs close to the chosen  
1062 thresholds.

1063 *Signal extraction and analysis.* Signal extraction, correlation and spectral analysis for calcium  
1064 signal was performed using Python (Python Software Foundation, NH, USA) in the Spyder  
1065 (Pierre Raybaut, The Spyder Development Team) development environment. Calcium imaging

1066 data were analyzed with the Suite2p toolbox (Pachitariu et al., 2017) using the parameters  
 1067 given in table 1.

1068

| Parameter                                                                                                               | Variable          | Value      |
|-------------------------------------------------------------------------------------------------------------------------|-------------------|------------|
| Sampling rate, frames per second                                                                                        | fs                | 30         |
| <u>Registration</u>                                                                                                     |                   |            |
| Subsampled frames for finding reference image                                                                           | nimg_init         | 2000       |
| Number of frames per batch                                                                                              | batch_size        | 200        |
| Maximum allowed registration shift, as a fraction of frame max(width and height)                                        | maxregshift       | 0.1        |
| Precision of subpixel registration (1/subpixel steps)                                                                   | subpixel          | 10         |
| Smoothing                                                                                                               | smooth_sigma      | 1.15       |
| Bad frames to be excluded                                                                                               | th_badframes      | 100.0      |
| <u>Non-rigid registration</u>                                                                                           |                   |            |
| Use nonrigid registration                                                                                               | nonrigid          | True       |
| Block size to register (** keep this a multiple of 2 **)                                                                | block_size        | [128,128]  |
| if any nonrigid block is below this threshold, it gets smoothed until above this threshold. 1.0 results in no smoothing | snr_thresh        | 2.0        |
| maximum pixel shift allowed for nonrigid, relative to rigid                                                             | maxregshiftNR     | 10         |
| <u>Cell detection</u>                                                                                                   |                   |            |
| Run ROI extraction                                                                                                      | roidetect         | True       |
| Run sparse_mode                                                                                                         | sparse_mode       | False      |
| Diameter for filtering and extracting                                                                                   | diameter          | 12.0       |
| Keep ROIs fully connected (set to 0 for dendrites)                                                                      | connected         | True       |
| Maximum number of binned frames for cell detection                                                                      | nbinned           | 5000       |
| Maximum number of iterations to do cell detection                                                                       | max_iterations    | 20         |
| Adjust the automatically determined threshold by this scalar multiplier                                                 | threshold_scaling | 1.0 or 0.1 |

|                                                                                 |                       |      |
|---------------------------------------------------------------------------------|-----------------------|------|
| Cells with more overlap than this get removed during triage, before refinement  | max_overlap           | 0.75 |
| Running mean subtraction with window of size 'high_pass'                        | high_pass             | 100  |
| <u>ROI extraction</u>                                                           |                       |      |
| Number of pixels to keep between ROI and neuropil donut                         | inner_neuropil_radius | 2    |
| Minimum number of pixels in the neuropil                                        | min_neuropil_pixels   | 100  |
| Pixels that are overlapping are thrown out (False) or added to both ROIs (True) | allow_overlap         | True |
| <u>Deconvolution</u>                                                            |                       |      |
| Deconvolution time constant, seconds                                            | tau                   | 0.7  |

1069

1070 The same analytical pipeline was applied to both the raw fluorescence traces as well as the  
1071 deconvolved (“spikes”) signal, as extracted by the Suite2p toolbox. Generally, the raw  
1072 fluorescence signal was preferred over the deconvolved one given that its extraction is more  
1073 straightforward and relies on less assumptions. However, while the reported effects varied in  
1074 magnitude depending on which of the two signals was considered, the same results were  
1075 obtained on both datasets. The effects were entirely consistent. For raw signal analysis of each  
1076 neuron, previous to any further step, we subtracted 0.7 of the corresponding neuropil  
1077 fluorescence trace.

1078 The number and height of calcium transients properties were calculated with the scipy function  
1079 *find\_peaks* on the raw calcium traces with the following parameters: height = 200, distance =  
1080 10 and prominence = 200. The decay was computed on the 10 best-isolated transients of each  
1081 neuron, using the OASIS toolbox (<https://github.com/j-friedrich/OASIS>). We used the  
1082 *deconvolve* function with the following parameters: penalty = 0, optimize\_g = 10. Traces with  
1083 an estimated decay over 2 seconds were considered cases of failed extraction and removed  
1084 from further analysis.

1085 The choice of the parameter values for transient detection is somewhat arbitrary. Similarly, it  
1086 is debatable whether and how the calcium traces should best be normalized. Therefore, we  
1087 tested the robustness of our findings by systematically varying signal extraction choices. We  
1088 first varied the height and prominence threshold across a wide range of values (50 to 700  
1089 arbitrary units). We further computed transients features on normalized  $\Delta F/F$  calcium traces.  
1090 To normalize calcium signals, we used the baseline value as extracted by the *deconvolve*  
1091 function. Also, in this case, we varied the height and prominence threshold across a wide range  
1092 of values (0.5 to 3 arbitrary units). Finally, we computed two measures of neuronal activity that  
1093 are independent of calcium transients detection: the average of the trace integral and its  
1094 standard deviation, with and without normalization. Across all of these scenarios, the reported  
1095 effects were robustly consistent.

1096 Correlations were computed both as Pearson (numpy function *corrcoeff*) and Spearman  
1097 (custom written function) coefficient on the z-scored signal. To both sets of coefficients, the

1098 Fisher correction (the inverse of the hyperbolic tangent function, numpy function *arctanh*) was  
1099 applied. For power analysis, we first created a population activity vector by summing all the  
1100 single neuron z-scored signals, and then estimated the power spectral density by applying the  
1101 Welch method (sampling frequency = 30 Hz, number of points for fast Fourier transformation  
1102 = 1024, no overlap, window length = 1 s).

1103 Complexity analysis was performed in the Matlab (MathWorks) environment. For complexity  
1104 analysis, we limited the amount of neurons to the minimum ( $N_{\min}$ ) present in any recording of  
1105 any condition for each single mouse (median = 265, min = 156, max = 1068). The resulting  
1106 matrix therefore had the  $T_{\text{rec}} \times N_{\min}$  dimensions, where  $T_{\text{rec}}$  represents the time vector for the  
1107 recording, with a length of 5 min and a sampling rate of 30 Hz. For recordings that had a  
1108 number of neurons larger than  $N_{\min}$  for that mouse, we randomly sampled  $n = N_{\min}$  neurons  
1109 and repeated the analysis 5 times. For every extracted parameter, we then considered the  
1110 median value over the 5 repetitions. For further analysis, the signal was downsampled from  
1111 the original sampling frequency of 30 Hz to 10 Hz (100 ms bins). The same analytical pipeline  
1112 was then applied to both the raw fluorescence traces, as well as the deconvolved signal.

1113 *tSNE clustering.* tSNE clustering was performed similar to (Wenzel et al., 2019). Briefly, in a  
1114 range between 5 and 45, the perplexity value that minimized the reconstruction error was  
1115 selected. The number of PCA components used for this step was limited to 30. For the raw  
1116 fluorescence signal, Euclidian distance was used, whereas for the deconvolved signal we  
1117 opted for cosine distance, as it is better suited to a sparse signal. We computed the probability  
1118 distribution of the resulting embedded matrix ( $2 \times T_{\text{rec}}$ ), that was then convolved with a 2D  
1119 Gaussian window (standard deviation was set to be equal to 1/40 of the total maximum value).  
1120 To evaluate the number of clusters in the distribution, we then applied a series of standard  
1121 steps in image analysis: background subtraction with the rolling ball method, smoothing with a  
1122 median filter, thresholding, watershedting to avoid undersegmentation, and extended minima  
1123 transformation. Finally, the exterior boundaries of the objects were traced and counted. This  
1124 gave the number of clusters.

1125 *Affinity Propagation Clustering (APC).* Affinity Propagation clustering was performed using a  
1126 Matlab toolbox [<https://www.psi.toronto.edu/index.php?q=affinity%20propagation>] and  
1127 similarly to (Wenzel et al., 2019). We first obtained a distance map, which was computed as 1  
1128 minus the pairwise cosine distance between observations of the  $T_{\text{rec}} \times N_{\min}$  matrix. This distance  
1129 matrix was then fed to the affinity propagation algorithm with the input preference set equal to  
1130 the median of the distance matrix.

1131 *Principal Component Analysis (PCA) clustering and variance explained.* Standard PCA was  
1132 applied to the  $T_{\text{rec}} \times N_{\min}$  matrix. The number of clusters was computed as the number of  
1133 components that was needed to cumulatively explain 90% of the variance of the input matrix.  
1134 Further, we computed the loglog decay coefficient of number of components versus variance  
1135 explained.

1136 *Community detection.* To detect communities, we used the Louvain algorithm from the Brain  
1137 Connectivity Toolbox (<https://sites.google.com/site/bctnet/>), a modularity maximization  
1138 procedure widely used in studies examining brain networks (Rubinov and Sporns, 2010). This  
1139 approach aims at subdividing the network into partitions that are more internally dense than  
1140 would be expected by chance (Sporns and Betzel, 2016). As input to the algorithm, we used  
1141 Fisher-transformed correlation matrices obtained from calcium imaging time-series. Matrices  
1142 were not thresholded, and both positive and negative correlations were taken into account to  
1143 determine optimal modular partitions. The algorithm was evaluated while varying the resolution



1144 parameter gamma between 0 and 3, in steps of 0.1. For the multiresolution approach and  
1145 hierarchical consensus clustering, data was analyzed using code available at  
1146 <https://github.com/LJeub/HierarchicalConsensus> and according to the procedure described in  
1147 (Jeub et al., 2018). The number of communities detected by the finest level partition of the  
1148 consensus hierarchy was used for further analysis. While neurons in the awake condition  
1149 tended to be spatially closer to each other than for the other conditions (Fig. S10E), this is  
1150 unlikely to have influenced the results of the analysis, as the difference was minimal and there  
1151 was no correlation between median distance in a recording and the number of detected  
1152 communities (Fig. S10F).

### 1153 Two-Photon Spine Image Processing

1154 In each animal, at least one GFP-expressing CA1 pyramidal neuron was selected and 1-3  
1155 dendrites of 20–50  $\mu\text{m}$  length of each of the following types were analyzed: basal dendrites,  
1156 oblique dendrites emerging from the apical trunk and tuft dendrites. Motion artefacts were  
1157 corrected with a custom-modified Lucas-Kanade-based alignment algorithm written in Matlab.  
1158 Spines that laterally emanated from the dendrite were counted by manually scrolling through  
1159 the z-stacks of subsequent imaging time points of the same dendritic element, by an expert  
1160 examiner blinded to the experimental condition. Protrusions from the dendrite that reached a  
1161 threshold of 0.2  $\mu\text{m}$  were scored as dendritic spines regardless of shape. If spine neck  
1162 positions differed 0.5  $\mu\text{m}$  on the subsequent images, the spine was scored as a new spine.  
1163 Spines were scored as lost if they fell below the threshold of 0.2  $\mu\text{m}$ . Spine density was  
1164 calculated as the number of spines per  $\mu\text{m}$ . The turnover ratio was calculated for every time  
1165 point by dividing the sum of gained and lost spines by the number of present spines. The  
1166 survival fraction of spines was calculated as the percentage of remaining spines compared  
1167 with the first imaging time point.

### 1168 Statistical analysis

1169 Statistical analyses were performed using R Statistical Software (Foundation for Statistical  
1170 Computing, Vienna, Austria) or GraphPad Prism. All R scripts and datasets are available on  
1171 github <https://github.com/mchini/Calcium-Imaging---Anesthesia>. Nested data were analyzed  
1172 with linear mixed-effect models to account for the commonly ignored increased false positive  
1173 rate inherent in nested design (Aarts et al., 2014). We used “mouse”, “recording”, “neuron”  
1174 (calcium imaging), and “single unit” (electrophysiology) as random effects, according to the  
1175 specific experimental design. Parameter estimation was done using the lmer function  
1176 implemented in the *lme4* R package (Bates et al., 2015). Model selection was performed  
1177 according to experimental design. Significance and summary tables for lmer model fits were  
1178 evaluated with the *lmerTest* R package (Kuznetsova et al., 2017), using the Satterthwaite's  
1179 degrees of freedom method. Post hoc analysis with Tukey multiple comparison correction was  
1180 carried out using the *emmeans* R package.

1181

## 1182 REFERENCES

1183 Aarts, E., Verhage, M., Veenvliet, J.V., Dolan, C.V., and van der Sluis, S. (2014). A solution to  
1184 dependency: using multilevel analysis to accommodate nested data. *Nat Neurosci* 17, 491-  
1185 496.

1186 Albrecht, M., Henke, J., Tacke, S., Markert, M., and Guth, B. (2014). Effects of isoflurane,  
1187 ketamine-xylazine and a combination of medetomidine, midazolam and fentanyl on

- 1188 physiological variables continuously measured by telemetry in Wistar rats. *BMC Vet Res* 10,  
1189 198.
- 1190 Alkire, M.T., Hudetz, A.G., and Tononi, G. (2008). Consciousness and anesthesia. *Science*  
1191 322, 876-880.
- 1192 Antognini, J.F., and Carstens, E. (2002). In vivo characterization of clinical anaesthesia and its  
1193 components. *Br J Anaesth* 89, 156-166.
- 1194 Attardo, A., Fitzgerald, J.E., and Schnitzer, M.J. (2015). Impermanence of dendritic spines in  
1195 live adult CA1 hippocampus. *Nature* 523, 592-596.
- 1196 Bates, D., Machler, M., Bolker, B.M., and Walker, S.C. (2015). Fitting Linear Mixed-Effects  
1197 Models Using lme4. *J Stat Softw* 67, 1-48.
- 1198 Bittner, K.C., Grienberger, C., Vaidya, S.P., Milstein, A.D., Macklin, J.J., Suh, J., Tonegawa,  
1199 S., and Magee, J.C. (2015). Conjunctive input processing drives feature selectivity in  
1200 hippocampal CA1 neurons. *Nat Neurosci*.
- 1201 Bonin, R.P., and Orser, B.A. (2008). GABA(A) receptor subtypes underlying general  
1202 anesthesia. *Pharmacol Biochem Behav* 90, 105-112.
- 1203 Briner, A., De Roo, M., Dayer, A., Muller, D., Habre, W., and Vutskits, L. (2010). Volatile  
1204 anesthetics rapidly increase dendritic spine density in the rat medial prefrontal cortex during  
1205 synaptogenesis. *Anesthesiology* 112, 546-556.
- 1206 Briner, A., Nikonenko, I., De Roo, M., Dayer, A., Muller, D., and Vutskits, L. (2011).  
1207 Developmental Stage-dependent persistent impact of propofol anesthesia on dendritic spines  
1208 in the rat medial prefrontal cortex. *Anesthesiology* 115, 282-293.
- 1209 Buzsaki, G. (1986). Hippocampal sharp waves: their origin and significance. *Brain Res* 398,  
1210 242-252.
- 1211 Buzsaki, G., Anastassiou, C.A., and Koch, C. (2012). The origin of extracellular fields and  
1212 currents--EEG, ECoG, LFP and spikes. *Nat Rev Neurosci* 13, 407-420.
- 1213 Canolty, R.T., and Knight, R.T. (2010). The functional role of cross-frequency coupling. *Trends*  
1214 *in cognitive sciences* 14, 506-515.
- 1215 Chen, G., Chen, K.S., Knox, J., Inglis, J., Bernard, A., Martin, S.J., Justice, A., McConlogue,  
1216 L., Games, D., Freedman, S.B., and Morris, R.G. (2000). A learning deficit related to age and  
1217 beta-amyloid plaques in a mouse model of Alzheimer's disease. *Nature* 408, 975-979.
- 1218 Chen, T.W., Wardill, T.J., Sun, Y., Pulver, S.R., Renninger, S.L., Baohan, A., Schreiter, E.R.,  
1219 Kerr, R.A., Orger, M.B., Jayaraman, V., *et al.* (2013). Ultrasensitive fluorescent proteins for  
1220 imaging neuronal activity. *Nature* 499, 295-300.
- 1221 Chini, M., Gretenkord, S., Kostka, J.K., Popplau, J.A., Cornelissen, L., Berde, C.B., Hanganu-  
1222 Opatz, I.L., and Bitzenhofer, S.H. (2019). Neural Correlates of Anesthesia in Newborn Mice  
1223 and Humans. *Frontiers in neural circuits* 13, 38.
- 1224 Clark, D.L., and Rosner, B.S. (1973). Neurophysiologic effects of general anesthetics. I. The  
1225 electroencephalogram and sensory evoked responses in man. *Anesthesiology* 38, 564-582.
- 1226 Collins, D.R., Pelletier, J.G., and Pare, D. (2001). Slow and fast (gamma) neuronal oscillations  
1227 in the perirhinal cortex and lateral amygdala. *J Neurophysiol* 85, 1661-1672.

- 1228 Contreras, D., and Steriade, M. (1995). Cellular basis of EEG slow rhythms: a study of dynamic  
1229 corticothalamic relationships. *J Neurosci* 15, 604-622.
- 1230 Cutts, C.S., and Eglen, S.J. (2014). Detecting pairwise correlations in spike trains: an objective  
1231 comparison of methods and application to the study of retinal waves. *J Neurosci* 34, 14288-  
1232 14303.
- 1233 Dailey, M.E., and Smith, S.J. (1996). The dynamics of dendritic structure in developing  
1234 hippocampal slices. *J Neurosci* 16, 2983-2994.
- 1235 De Roo, M., Klausner, P., Briner, A., Nikonenko, I., Mendez, P., Dayer, A., Kiss, J.Z., Muller, D.,  
1236 and Vutskits, L. (2009). Anesthetics rapidly promote synaptogenesis during a critical period of  
1237 brain development. *PLoS one* 4, e7043.
- 1238 De Roo, M., Klausner, P., and Muller, D. (2008). LTP promotes a selective long-term  
1239 stabilization and clustering of dendritic spines. *PLoS Biol* 6, e219.
- 1240 Fleischmann, T., Jirkof, P., Henke, J., Arras, M., and Cesarovic, N. (2016). Injection  
1241 anaesthesia with fentanyl-midazolam-medetomidine in adult female mice: importance of  
1242 antagonization and perioperative care. *Lab Anim* 50, 264-274.
- 1243 Franks, N.P. (2008). General anaesthesia: from molecular targets to neuronal pathways of  
1244 sleep and arousal. *Nat Rev Neurosci* 9, 370-386.
- 1245 Frey, U., and Morris, R.G. (1997). Synaptic tagging and long-term potentiation. *Nature* 385,  
1246 533-536.
- 1247 Gao, R., Peterson, E.J., and Voytek, B. (2017). Inferring synaptic excitation/inhibition balance  
1248 from field potentials. *NeuroImage* 158, 70-78.
- 1249 Goltstein, P.M., Montijn, J.S., and Pennartz, C.M. (2015). Effects of isoflurane anesthesia on  
1250 ensemble patterns of Ca<sup>2+</sup> activity in mouse v1: reduced direction selectivity independent of  
1251 increased correlations in cellular activity. *PLoS one* 10, e0118277.
- 1252 Greenberg, D.S., Houweling, A.R., and Kerr, J.N. (2008). Population imaging of ongoing  
1253 neuronal activity in the visual cortex of awake rats. *Nat Neurosci* 11, 749-751.
- 1254 Gu, L., Kleiber, S., Schmid, L., Nebeling, F., Chamoun, M., Steffen, J., Wagner, J., and  
1255 Fuhrmann, M. (2014). Long-term in vivo imaging of dendritic spines in the hippocampus  
1256 reveals structural plasticity. *J Neurosci* 34, 13948-13953.
- 1257 Hardingham, G.E., and Bading, H. (2010). Synaptic versus extrasynaptic NMDA receptor  
1258 signalling: implications for neurodegenerative disorders. *Nat Rev Neurosci*.
- 1259 Harris, K.D., and Mrsic-Flogel, T.D. (2013). Cortical connectivity and sensory coding. *Nature*  
1260 503, 51-58.
- 1261 Jeub, L.G.S., Sporns, O., and Fortunato, S. (2018). Multiresolution Consensus Clustering in  
1262 Networks. *Scientific reports* 8.
- 1263 Kasai, H., Fukuda, M., Watanabe, S., Hayashi-Takagi, A., and Noguchi, J. (2010). Structural  
1264 dynamics of dendritic spines in memory and cognition. *Trends Neurosci* 33, 121-129.
- 1265 Katz, Y., Menon, V., Nicholson, D.A., Geinisman, Y., Kath, W.L., and Spruston, N. (2009).  
1266 Synapse distribution suggests a two-stage model of dendritic integration in CA1 pyramidal  
1267 neurons. *Neuron* 63, 171-177.

- 1268 Klausberger, T., and Somogyi, P. (2008). Neuronal diversity and temporal dynamics: the unity  
1269 of hippocampal circuit operations. *Science* 321, 53-57.
- 1270 Klinzing, J.G., Niethard, N., and Born, J. (2019). Mechanisms of systems memory  
1271 consolidation during sleep. *Nat Neurosci* 22, 1598-1610.
- 1272 Kuznetsova, A., Brockhoff, P.B., and Christensen, R.H.B. (2017). lmerTest Package: Tests in  
1273 Linear Mixed Effects Models. *J Stat Softw* 82, 1-26.
- 1274 Langsjö, J.W., Maksimow, A., Salmi, E., Kaisti, K., Aalto, S., Oikonen, V., Hinkka, S., Aantaa,  
1275 R., Sipilä, H., Viljanen, T., *et al.* (2005). S-ketamine anesthesia increases cerebral blood flow  
1276 in excess of the metabolic needs in humans. *Anesthesiology* 103, 258-268.
- 1277 Larkum, M. (2012). A cellular mechanism for cortical associations: an organizing principle for  
1278 the cerebral cortex. *Trends Neurosci*.
- 1279 Lee, U., Ku, S., Noh, G., Baek, S., Choi, B., and Mashour, G.A. (2013). Disruption of frontal-  
1280 parietal communication by ketamine, propofol, and sevoflurane. *Anesthesiology* 118, 1264-  
1281 1275.
- 1282 Lendvai, B., Stern, E.A., Chen, B., and Svoboda, K. (2000). Experience-dependent plasticity  
1283 of dendritic spines in the developing rat barrel cortex in vivo. *Nature* 404, 876-881.
- 1284 Li, N., Lee, B., Liu, R.J., Banasr, M., Dwyer, J.M., Iwata, M., Li, X.Y., Aghajanian, G., and  
1285 Duman, R.S. (2010). mTOR-dependent synapse formation underlies the rapid antidepressant  
1286 effects of NMDA antagonists. *Science* 329, 959-964.
- 1287 Lin, H., Higgins, P., Loh, H.H., Law, P.Y., and Liao, D. (2009). Bidirectional effects of fentanyl  
1288 on dendritic spines and AMPA receptors depend upon the internalization of mu opioid  
1289 receptors. *Neuropsychopharmacology* 34, 2097-2111.
- 1290 Mashour, G.A., Orser, B.A., and Avidan, M.S. (2011). Intraoperative awareness: from  
1291 neurobiology to clinical practice. *Anesthesiology* 114, 1218-1233.
- 1292 Mizrahi-Kliger, A.D., Kaplan, A., Israel, Z., and Bergman, H. (2018). Desynchronization of slow  
1293 oscillations in the basal ganglia during natural sleep. *Proc Natl Acad Sci U S A* 115, E4274-  
1294 E4283.
- 1295 Morellini, F. (2013). Spatial memory tasks in rodents: what do they model? *Cell Tissue Res*  
1296 354, 273-286.
- 1297 Moscovitch, M., Cabeza, R., Winocur, G., and Nadel, L. (2016). Episodic Memory and Beyond:  
1298 The Hippocampus and Neocortex in Transformation. *Annual review of psychology* 67, 105-  
1299 134.
- 1300 Nadel, L., and Moscovitch, M. (1997). Memory consolidation, retrograde amnesia and the  
1301 hippocampal complex. *Curr Opin Neurobiol* 7, 217-227.
- 1302 Nagerl, U.V., Eberhorn, N., Cambridge, S.B., and Bonhoeffer, T. (2004). Bidirectional activity-  
1303 dependent morphological plasticity in hippocampal neurons. *Neuron* 44, 759-767.
- 1304 Neves, G., Cooke, S.F., and Bliss, T.V. (2008). Synaptic plasticity, memory and the  
1305 hippocampus: a neural network approach to causality. *Nat Rev Neurosci* 9, 65-75.
- 1306 Newman, M.E., and Girvan, M. (2004). Finding and evaluating community structure in  
1307 networks. *Phys Rev E Stat Nonlin Soft Matter Phys* 69, 026113.

- 1308 O'Neill, J., Pleydell-Bouverie, B., Dupret, D., and Csicsvari, J. (2010). Play it again: reactivation  
1309 of waking experience and memory. *Trends Neurosci* 33, 220-229.
- 1310 Okun, M., Steinmetz, N., Cossell, L., Iacaruso, M.F., Ko, H., Bartho, P., Moore, T., Hofer, S.B.,  
1311 Mrsic-Flogel, T.D., Carandini, M., and Harris, K.D. (2015). Diverse coupling of neurons to  
1312 populations in sensory cortex. *Nature* 521, 511-515.
- 1313 Onslow, A.C., Bogacz, R., and Jones, M.W. (2011). Quantifying phase-amplitude coupling in  
1314 neuronal network oscillations. *Prog Biophys Mol Biol* 105, 49-57.
- 1315 Pachitariu, M., Stringer, C., Dipoppa, M., Schröder, S., Rossi, L.F., Dalgleish, H., Carandini,  
1316 M., and Harris, K.D. (2017). Suite2p: beyond 10,000 neurons with standard two-photon  
1317 microscopy. *bioRxiv*, 061507.
- 1318 Pfeiffer, T., Poll, S., Bancelin, S., Angibaud, J., Inavalli, V.K., Keppler, K., Mittag, M.,  
1319 Fuhrmann, M., and Nagerl, U.V. (2018). Chronic 2P-STED imaging reveals high turnover of  
1320 dendritic spines in the hippocampus in vivo. *eLife* 7.
- 1321 Phoumthippavong, V., Barthas, F., Hassett, S., and Kwan, A.C. (2016). Longitudinal Effects  
1322 of Ketamine on Dendritic Architecture In Vivo in the Mouse Medial Frontal Cortex. *eNeuro* 3.
- 1323 Portera-Cailliau, C., Pan, D.T., and Yuste, R. (2003). Activity-regulated dynamic behavior of  
1324 early dendritic protrusions: evidence for different types of dendritic filopodia. *J Neurosci* 23,  
1325 7129-7142.
- 1326 Pryazhnikov, E., Mugantseva, E., Casarotto, P., Kolikova, J., Fred, S.M., Toptunov, D.,  
1327 Afzalov, R., Hotulainen, P., Voikar, V., Terry-Lorenzo, R., *et al.* (2018). Longitudinal two-photon  
1328 imaging in somatosensory cortex of behaving mice reveals dendritic spine formation  
1329 enhancement by subchronic administration of low-dose ketamine. *Scientific reports* 8, 6464.
- 1330 Purdon, P.L., Sampson, A., Pavone, K.J., and Brown, E.N. (2015). Clinical  
1331 Electroencephalography for Anesthesiologists: Part I: Background and Basic Signatures.  
1332 *Anesthesiology* 123, 937-960.
- 1333 Rose, T., Jaepel, J., Hubener, M., and Bonhoeffer, T. (2016). Cell-specific restoration of  
1334 stimulus preference after monocular deprivation in the visual cortex. *Science* 352, 1319-1322.
- 1335 Rossant, C., Kadir, S.N., Goodman, D.F.M., Schulman, J., Hunter, M.L.D., Saleem, A.B.,  
1336 Grosmark, A., Belluscio, M., Denfield, G.H., Ecker, A.S., *et al.* (2016). Spike sorting for large,  
1337 dense electrode arrays. *Nat Neurosci* 19, 634-641.
- 1338 Rubinov, M., and Sporns, O. (2010). Complex network measures of brain connectivity: Uses  
1339 and interpretations. *NeuroImage* 52, 1059-1069.
- 1340 Rudolph, U., and Antkowiak, B. (2004). Molecular and neuronal substrates for general  
1341 anaesthetics. *Nat Rev Neurosci* 5, 709-720.
- 1342 Sanders, R.D., Tononi, G., Laureys, S., and Sleigh, J.W. (2012). Unresponsiveness not equal  
1343 unconsciousness. *Anesthesiology* 116, 946-959.
- 1344 Sarasso, S., Boly, M., Napolitani, M., Gosseries, O., Charland-Verville, V., Casarotto, S.,  
1345 Rosanova, M., Casali, A.G., Brichant, J.F., Boveroux, P., *et al.* (2015). Consciousness and  
1346 Complexity during Unresponsiveness Induced by Propofol, Xenon, and Ketamine. *Curr Biol*  
1347 25, 3099-3105.

- 1348 Scheffer-Teixeira, R., Belchior, H., Caixeta, F.V., Souza, B.C., Ribeiro, S., and Tort, A.B.  
1349 (2012). Theta phase modulates multiple layer-specific oscillations in the CA1 region. *Cereb*  
1350 *Cortex* 22, 2404-2414.
- 1351 Schmid, L.C., Mittag, M., Poll, S., Steffen, J., Wagner, J., Geis, H.R., Schwarz, I., Schmidt, B.,  
1352 Schwarz, M.K., Remy, S., and Fuhrmann, M. (2016). Dysfunction of Somatostatin-Positive  
1353 Interneurons Associated with Memory Deficits in an Alzheimer's Disease Model. *Neuron* 92,  
1354 114-125.
- 1355 Schomburg, E.W., Fernandez-Ruiz, A., Mizuseki, K., Berenyi, A., Anastassiou, C.A., Koch, C.,  
1356 and Buzsaki, G. (2014). Theta phase segregation of input-specific gamma patterns in  
1357 entorhinal-hippocampal networks. *Neuron* 84, 470-485.
- 1358 Segal, M. (2005). Dendritic spines and long-term plasticity. *Nat Rev Neurosci* 6, 277-284.
- 1359 Sheintuch, L., Rubin, A., Brande-Eilat, N., Geva, N., Sadeh, N., Pinchasof, O., and Ziv, Y.  
1360 (2017). Tracking the Same Neurons across Multiple Days in Ca(2+) Imaging Data. *Cell reports*  
1361 21, 1102-1115.
- 1362 Soltesz, I., and Deschenes, M. (1993). Low- and high-frequency membrane potential  
1363 oscillations during theta activity in CA1 and CA3 pyramidal neurons of the rat hippocampus  
1364 under ketamine-xylazine anesthesia. *J Neurophysiol* 70, 97-116.
- 1365 Sporns, O., and Betzel, R.F. (2016). Modular Brain Networks. *Annual review of psychology* 67,  
1366 613-640.
- 1367 Steriade, M., Nunez, A., and Amzica, F. (1993). A novel slow (< 1 Hz) oscillation of neocortical  
1368 neurons in vivo: depolarizing and hyperpolarizing components. *J Neurosci* 13, 3252-3265.
- 1369 Sur, C., Fresu, L., Howell, O., McKernan, R.M., and Atack, J.R. (1999). Autoradiographic  
1370 localization of alpha5 subunit-containing GABAA receptors in rat brain. *Brain Res* 822, 265-  
1371 270.
- 1372 Thevenaz, P., Ruttimann, U.E., and Unser, M. (1998). A pyramid approach to subpixel  
1373 registration based on intensity. *IEEE Trans Image Process* 7, 27-41.
- 1374 Urban, B.W., and Bleckwenn, M. (2002). Concepts and correlations relevant to general  
1375 anaesthesia. *Br J Anaesth* 89, 3-16.
- 1376 Vinck, M., Battaglia, F.P., Womelsdorf, T., and Pennartz, C. (2012). Improved measures of  
1377 phase-coupling between spikes and the Local Field Potential. *J Comput Neurosci* 33, 53-75.
- 1378 Vinck, M., van Wingerden, M., Womelsdorf, T., Fries, P., and Pennartz, C.M. (2010). The  
1379 pairwise phase consistency: a bias-free measure of rhythmic neuronal synchronization.  
1380 *NeuroImage* 51, 112-122.
- 1381 Vutskits, L., and Xie, Z. (2016). Lasting impact of general anaesthesia on the brain:  
1382 mechanisms and relevance. *Nat Rev Neurosci* 17, 705-717.
- 1383 Wenzel, M., Han, S., Smith, E.H., Hoel, E., Greger, B., House, P.A., and Yuste, R. (2019).  
1384 Reduced Repertoire of Cortical Microstates and Neuronal Ensembles in Medically Induced  
1385 Loss of Consciousness. *Cell Syst* 8, 467-474 e464.
- 1386 West, A.E., Griffith, E.C., and Greenberg, M.E. (2002). Regulation of transcription factors by  
1387 neuronal activity. *Nat Rev Neurosci* 3, 921-931.

- 1388 Whitlock, J.R., Heynen, A.J., Shuler, M.G., and Bear, M.F. (2006). Learning induces long-term  
1389 potentiation in the hippocampus. *Science* 313, 1093-1097.
- 1390 Wiegert, J.S., and Bading, H. (2011). Activity-dependent calcium signaling and ERK-MAP  
1391 kinases in neurons: a link to structural plasticity of the nucleus and gene transcription  
1392 regulation. *Cell calcium* 49, 296-305.
- 1393 Wiegert, J.S., and Oertner, T.G. (2013). Long-term depression triggers the selective  
1394 elimination of weakly integrated synapses. *Proc Natl Acad Sci U S A* 110, E4510-4519.
- 1395 Wiegert, J.S., Pulin, M., Gee, C.E., and Oertner, T.G. (2018). The fate of hippocampal  
1396 synapses depends on the sequence of plasticity-inducing events. *eLife* 7.
- 1397 Yamakage, M., Hirshman, C.A., and Croxton, T.L. (1995). Inhibitory effects of thiopental,  
1398 ketamine, and propofol on voltage-dependent Ca<sup>2+</sup> channels in porcine tracheal smooth  
1399 muscle cells. *Anesthesiology* 83, 1274-1282.
- 1400 Yang, G., Chang, P.C., Bekker, A., Blanck, T.J., and Gan, W.B. (2011). Transient effects of  
1401 anesthetics on dendritic spines and filopodia in the living mouse cortex. *Anesthesiology* 115,  
1402 718-726.
- 1403 Yang, G., Pan, F., and Gan, W.B. (2009). Stably maintained dendritic spines are associated  
1404 with lifelong memories. *Nature* 462, 920-924.
- 1405 Yang, Y., Cui, Y., Sang, K., Dong, Y., Ni, Z., Ma, S., and Hu, H. (2018). Ketamine blocks  
1406 bursting in the lateral habenula to rapidly relieve depression. *Nature* 554, 317-322.
- 1407 Zurek, A.A., Bridgwater, E.M., and Orser, B.A. (2012). Inhibition of alpha5 gamma-  
1408 Aminobutyric acid type A receptors restores recognition memory after general anesthesia.  
1409 *Anesth Analg* 114, 845-855.
- 1410 Zurek, A.A., Yu, J., Wang, D.S., Haffey, S.C., Bridgwater, E.M., Penna, A., Lecker, I., Lei, G.,  
1411 Chang, T., Salter, E.W., and Orser, B.A. (2014). Sustained increase in alpha5GABAA receptor  
1412 function impairs memory after anesthesia. *J Clin Invest* 124, 5437-5441.
- 1413
